1 Extracellular adenosine enhances the ability of PMNs to kill *Streptococcus*  
2 *pneumoniae* by inhibiting IL-10 production

3  
4 Nalat Siwapornchai<sup>\*†</sup>, James N. Lee<sup>\*†</sup>, Essi Y. I. Tchalla<sup>‡</sup>, Manmeet Bhalla<sup>‡</sup>, Jun  
5 Hui Yeoh<sup>‡</sup>, Sara E. Roggensack<sup>†</sup> John M. Leong<sup>†</sup> and Elsa N. Bou Ghanem<sup>‡</sup>

6  
7 Author affiliations: <sup>†</sup>Department of Molecular Biology and Microbiology at Tufts  
8 University School of Medicine, Boston, MA 02111 USA

9 <sup>‡</sup>Department of Microbiology and Immunology, University at Buffalo School of  
10 Medicine, Buffalo, NY 14203, USA

11 \*These authors contributed equally to this work

12 Summary Sentence: Extracellular adenosine produced by CD73 promotes the  
13 ability of PMNs to kill *Streptococcus pneumoniae* by blunting IL-10 production

14 Running Title: PMN anti-bacterial phenotype requires CD73

15 Corresponding author information: Elsa N. Bou Ghanem, 955 Main Street,  
16 Buffalo, NY, 14203. Telephone: 716-829-2422. Email: [elsaboug@buffalo.edu](mailto:elsaboug@buffalo.edu)

17 Key Words: Neutrophil phenotype, CD73, anti-microbial, pneumonia, reactive  
18 oxygen species

19

20

21

22

23

24 **Abbreviations**

25 CFU: Colony Forming Units

26 CT: Cycle Thresh-hold

27 EAD: Extracellular Adenosine

28 I.P: Intra Peritoneal

29 I.T: Intra Tracheal

30 MFI (Mean Fluorescent Intensity)

31 MOI: Multiplicity of Infection

32 MPO: Myeloperoxidase

33 NE: Neutrophil Elastase

34 OPH: Opsonophagocytic

35 PLY: Pneumolysin

36 PMA: Phorbol 12-myristate 13-acetate

37 PMNs: Polymorphonuclear Leukocytes

38 Pneumococcus: *Streptococcus pneumoniae*

39 ROS: Reactive Oxygen Species

40 SodA: Superoxide Dismutase

41 WT: Wild Type

42

43

44

45

46

47 **Abstract**

48 PMNs are crucial for initial control of *Streptococcus pneumoniae* (pneumococcus)  
49 lung infection; however, as the infection progresses their persistence in the lungs  
50 becomes detrimental. Here we explored why the anti-microbial efficacy of PMNs  
51 declines over the course of infection. We found that the progressive inability of  
52 PMNs to control infection correlated with phenotypic differences characterized by  
53 a decrease in CD73 expression, an enzyme required for production of  
54 extracellular adenosine (EAD). EAD production by CD73 was crucial for the  
55 ability of both murine and human PMNs to kill *S. pneumoniae*. In exploring the  
56 mechanisms by which CD73 controlled PMN function, we found that CD73  
57 mediated its anti-microbial activity by inhibiting IL-10 production. PMNs from wild  
58 type mice did not increase IL-10 production in response to *S. pneumoniae*,  
59 however, CD73<sup>-/-</sup> PMNs up-regulated IL-10 production upon pneumococcal  
60 infection *in vitro* and during lung challenge. IL-10 inhibited the ability of wild type  
61 PMNs to kill pneumococci. Conversely, blocking IL-10 boosted the bactericidal  
62 activity of CD73<sup>-/-</sup> PMNs as well as host resistance of CD73<sup>-/-</sup> mice to  
63 pneumococcal pneumonia. CD73/IL-10 did not affect apoptosis, bacterial uptake  
64 and intracellular killing or production of anti-microbial Neutrophil Elastase and  
65 Myeloperoxidase. Rather, inhibition of IL-10 production by CD73 was important  
66 for optimal ROS production by PMNs. ROS contributed to PMN anti-microbial  
67 function as their removal or detoxification impaired the ability of PMNs to  
68 efficiently kill *S. pneumoniae*. This study demonstrates that CD73 controls PMN  
69 anti-microbial phenotype during *S. pneumoniae* infection.

70

## 71 **1. Introduction**

72 Neutrophils, also known as polymorphonuclear leukocytes or PMNs, play  
73 a major role in host defense against *S. pneumoniae* lung infection (1, 2). PMNs  
74 are required to control bacterial burden early in the infectious process. In mouse  
75 models, early PMN recruitment into the lungs within the first 12 hours following  
76 pneumococcal pulmonary infection coincided with a decrease in bacterial  
77 numbers and immunodepletion of PMNs prior to infection resulted in host lethality  
78 (3). *Ex vivo*, PMNs are thought to kill *S. pneumoniae* by engulfing the bacteria  
79 and producing serine proteases including cathepsin G (CG) and neutrophil  
80 elastase (NE) (4), which also play a role in controlling bacterial numbers in  
81 murine models of pneumonia (5). Interestingly, later during infection, PMN  
82 persistence in the lungs promotes disease (3, 6, 7). In fact, we previously found  
83 that depletion of PMNs 18 hours after pneumococcal lung infection results in  
84 reduced bacterial numbers and enhanced mouse survival (3). These findings  
85 demonstrate that while PMNs are required at the start of infection, their  
86 persistence is detrimental for host survival. This also suggested that the  
87 antibacterial function of these innate immune cells and their ability to clear  
88 pneumococci is altered during the course of infection (3). However, the  
89 mechanisms of this alteration in PMN phenotype remain unexplored.

90 A major regulator of host resistance to pneumococcal infection is  
91 extracellular adenosine (EAD) (3). Upon damage due to a variety of insults  
92 including infection, ATP is thought to leak from damaged cells into the

93 extracellular space and is converted into EAD by the sequential action of two  
94 exonucleosidases, CD39 and CD73 (8). EAD can then signal via four known  
95 receptors, i.e. A1, A2A, A2B and A3 (9). Several drugs targeting this pathway are  
96 in clinical studies (9), making it an attractive avenue for modulating immune  
97 responses during infection. We previously found that blocking EAD production by  
98 CD73 dramatically increases bacterial numbers in organs and results in host  
99 lethality upon *S. pneumoniae* lung infection in mice (3). EAD production by CD73  
100 regulates PMN recruitment to the lungs and potentially boosts PMN function (3).

101 IL-10 is an anti-inflammatory cytokine associated with impaired control of  
102 pneumococcal pneumonia (10, 11). In mouse models, IL-10 levels increase in  
103 the lungs within 12 hours following pneumococcal challenge (10). Intranasal  
104 administration of IL-10 at the time of bacterial challenge results in decreased host  
105 survival and increased bacterial numbers in the lungs and blood, while blocking  
106 IL-10 enhances bacterial clearance and boosts host survival (10). Interestingly,  
107 while IL-10<sup>-/-</sup> mice have reduced lung and systemic bacterial loads, these mice  
108 suffer increased mortality due to excessive pulmonary inflammation (12). IL-10  
109 can be produced by many types of immune cells and it is now appreciated that  
110 murine PMNs produce this anti-inflammatory cytokine during infections (13-16).  
111 PMNs are a significant source of IL-10 in sepsis models (17) and stimulation with  
112 several bacterial pathogens, including *Escherichia coli*, *Shigella flexneri* and  
113 mycobacterial BCG, triggers IL-10 production by PMNs both *in vitro* and *in vivo*  
114 within 8 hours of infection (16). Parasitic infections such as *Leishmania major* (14)  
115 and *Trypanosoma cruzi* (15) also induce IL-10-producing PMNs during mouse

116 infection. IL-10 production by PMNs may reduce their microbicidal capacity, as  
117 *in vitro* treatment of PMNs with IL-10 impairs their ability to phagocytose  
118 *Staphylococcus aureus*, *Candida albicans* and *E. coli* and blunts superoxide  
119 production (18, 19). Further, in a *S. aureus* burn infection model, a subset of IL-  
120 10 producing PMNs is associated with impaired host resistance to infection (13).  
121 It is not currently known if *S. pneumoniae* infection triggers IL-10 production by  
122 PMNs.

123 In this study, we explored the involvement of CD73 in the diminished anti-  
124 microbial efficacy of PMNs during the course of pneumococcal pneumonia. We  
125 found that during the course of lung infection, CD73 expression on PMNs  
126 decreased. Notably, this change in CD73 expression coincided with an increase  
127 in IL-10-producing PMNs. CD73 suppressed IL-10 production by PMNs during  
128 infection and was required for the ability of these cells to kill *S. pneumoniae*. This  
129 study identifies a role for CD73 in maintaining the antimicrobial phenotype of  
130 PMNs and elucidates the mechanisms by which CD73 regulates PMN anti-  
131 microbial function and host resistance against *S. pneumoniae*.

132

## 133 **2. Materials and Methods**

### 134 *2.1 Mice*

135 All experiments were conducted in accordance with Institutional Animal Care and  
136 Use Committee (IACUC) guidelines. Wild type (WT) C57BL/6 mice were  
137 purchased from Jackson Laboratories (Bar Harbor, ME). CD73<sup>-/-</sup> mice on  
138 C57BL/6 background (8) were purchased from Jackson Laboratories and bred at

139 a specific-pathogen free facility at Tufts University and The University at Buffalo.

140 Female 8-12-week-old mice were used in all experiments.

141

## 142 *2.2 Bacteria*

143 Wild type *S. pneumoniae* TIGR4 AC316 strain (serotype 4) and pneumolysin-

144 deletion mutant ( $\Delta$ *PLY*) *S. pneumoniae* (20) were kind gifts from Andrew Camilli.

145 The superoxide dismutase in-frame deletion mutant ( $\Delta$ *sodA*) strain was

146 constructed via allelic exchange using linear pieces of DNA amplified by PCR

147 and the co-transformation approach previously outlined (21). Primers

148 SP\_0766\_F1 and SP\_0766\_R1 (table 1) were used to generate a linear piece of

149 DNA with homologous sequences in the pneumococcal genome upstream of

150 *sodA*, and primers SP\_0766\_F2 and SP\_0766\_R2 (table 1) amplified the region

151 downstream of *sodA*. These primers were designed with overlapping sequences,

152 such that when assembled using NEBuilder followed by a final PCR amplification

153 with the F1 and R2 primers (table 1), the entirety of the *sodA* sequence is deleted

154 except for the start and stop codons. The  $\Delta$ SP\_1051::cat sequence was

155 amplified from an existing  $\Delta$ SP\_1051::cat strain in the AC316 background (21)

156 using primers OS38 and OS39 (table 1). The two pieces of linear DNA were

157 transformed simultaneously into AC316 in a molar ratio of unmarked to marked

158 approximately 20:1. In cells that took up both pieces of linear DNA and

159 recombined them into the genome, *sodA* was deleted from the genome while

160 neutral gene SP\_1051 was replaced with a chloramphenicol resistance cassette.

161 Chloramphenicol-resistant transformants were screened for the gene deletion via

162 colony PCR using primers SP\_0766\_ColonyPCRF and SP\_0766\_ColonyPCRR  
163 (table 1). Double-positive clones were grown and saved in THY/glycerol for  
164 further verification. PCR amplification of both the  $\Delta$ SP\_1051::cat and  $\Delta$ sodA  
165 regions were performed using template gDNA extracted from a double-positive  
166 clone. Amplified DNA was run on agarose gels and imaged under UV-illumination.  
167 All bacteria were grown at 37°C in 5% CO<sub>2</sub> in Todd-Hewitt broth supplemented  
168 with 0.5% yeast extract and oxyrase until culture reached mid-exponential phase.  
169 Bacterial aliquots were frozen at -80°C in the growth media with 20% (v/v)  
170 glycerol. Prior to use, aliquots were thawed on ice, washed and suspended in  
171 PBS to obtain the appropriate concentration. The inoculums were then confirmed  
172 by serial dilution and dribble plating on Tryptic Soy Agar plates supplemented  
173 with 5% sheep blood agar.

174

### 175 *2.3 Isolation of PMNs*

176 Bone marrow cells were harvested from femurs and tibias of uninfected mice,  
177 flushed with RPMI 1640 supplemented with 10% FBS and 2 mM EDTA, and  
178 resuspended in PBS. Neutrophils were then separated from the rest of the bone  
179 marrow cells through density gradient centrifugation, using Histopaque 1119 and  
180 Histopaque 1077 as previously described (22). The isolated neutrophils  
181 were resuspended in Hanks' Balanced Salt Solution (HBSS)/0.1% gelatin  
182 without Ca<sup>2+</sup> and Mg<sup>2+</sup>, and used in subsequent assays. The purity of neutrophils  
183 was also measured by flow cytometry using APC-conjugated anti-Ly6G and 85-  
184 90% of enriched cells were Ly6G+.



185

#### 186 *2.4 Opsonophagocytic killing assay*

187 The ability of PMNs to kill pneumococci was assessed *ex vivo* through an  
188 Opsonophagocytic (OPH) killing assay as previously described (3, 23). Briefly,  
189 100µl reactions in HBSS/0.1% gelatin consisted of  $1 \times 10^5$  PMNs incubated with  
190  $1 \times 10^3$  bacteria grown to mid log phase and pre-opsonized with 3% mouse sera.  
191 The reactions were incubated rotating for 45 minutes at 37°C. Where indicated,  
192 PMNs were incubated with adenosine (100µM), rIL-10 (50ng/mL), anti-IL10  
193 (1ug/mL JES5-2A5) or isotype control (1ug/mL), 1x protease inhibitor cocktail,  
194 the CD37 inhibitor (100µM  $\alpha, \beta$  methylene ADP), the CD39 inhibitor (100µM  
195 POM-1), the ROS inhibitor Diphenyleneiodonium (DPI, 10µM) or the anti-oxidants  
196 EUK134 (25µM) or Ascorbic acid (100µM) for 30 minutes prior to adding pre-  
197 opsonized bacteria. IL-10 reagents were purchased from Biolegend and the  
198 inhibitors from Sigma. HBSS with 3% sera was added to PMNs without treatment  
199 as the control. Percent killing was determined by dribble plating on blood agar  
200 plates and calculated in comparison to no PMN control under the exact same  
201 conditions (+/- treatments).

202

#### 203 *2.5 IL-10 Enzyme-Linked Immunosorbent Assay (ELISA)*

204  $1 \times 10^6$  Bone marrow PMNs were incubated with HBSS/0.1% gelatin or adenosine  
205 for 30 minutes, followed by 45 minutes infection at 37° C with pre-opsonized *S.*  
206 *pneumoniae* TIGR4 at a MOI of 2 or mock treated with HBSS and sera only  
207 (uninfected). The reactions were spun down and the supernatants were obtained

208 to measure IL-10 production using Mouse IL-10 ELISA kit (eBioscience)  
209 according to manufacturer's instructions.

210

## 211 2.6 ROS Assay

212 Following isolation from the bone marrow, PMNs were re-suspended in HBSS  
213 ( $\text{Ca}^{2+}$  and  $\text{Mg}^{2+}$  free) and acclimated at room temperature for one hour. The cells  
214 were then spun down and re-suspended in KRP buffer (Phosphate buffered  
215 saline with 5mM glucose, 1mM  $\text{CaCl}_2$  and 1mM  $\text{MgSO}_4$ ) and equilibrated at room  
216 temperature for 30 minutes. The cells were then seeded in 96-well white  
217 LUMITRAC<sup>TM</sup> plates (Greiner Bio-One) at  $5 \times 10^5$  PMNs per well, treated with  
218 adenosine, anti-IL-10 or rIL-10 for 30 minutes at 37° C. For detection of  
219 extracellular ROS, 50 $\mu\text{M}$  Isoluminol (Sigma) plus 10U/ml HRP (Sigma) were  
220 added, while for detection of intracellular ROS, 50 $\mu\text{M}$  Luminol (Sigma) was  
221 added to the wells as previously described (24-27). The cells were infected with  
222 pre-opsonized *S. pneumoniae* TIGR4 at a MOI of 2 or mock treated with buffer  
223 containing 3% mouse sera (uninfected). PMNs treated with 100 nM Phorbol 12-  
224 myristate 13-acetate (PMA) (Sigma) were used as a positive control.  
225 Luminescence was immediately read (following infection) over a period of one  
226 hour at 37° C in a pre-warmed Biotek Plate reader. Wells containing buffer and  
227 Isoluminol plus HRP or Luminol alone were used as blanks.

228

## 229 2.7 Animal infections and scoring

230 Mice were lightly anesthetized with isoflurane and challenged intra-tracheally (i.t.)

231 with  $5 \times 10^5$  colony-forming units (CFU) of WT *S. pneumoniae* TIGR4 strain by  
232 instilling 50 $\mu$ l of bacteria directly into the trachea with the tongue pulled out to  
233 facilitate delivery of bacteria directly into the lungs (3). Following the infection,  
234 mice were monitored daily for weight loss and blindly scored for signs of sickness  
235 including weight loss, activity level, posture and breathing, scored as healthy [0]  
236 to severely sick [21] as previously described (28). The lung and brain were  
237 harvested and homogenized in sterile PBS. Blood was collected to follow  
238 bacteremia. Each sample was diluted in sterile PBS and dribble plated on blood  
239 agar plates to enumerate bacterial numbers.

240

#### 241 *2.8 Isolation of cells from the lungs and flow cytometry*

242 Mice were perfused with 10ml PBS, the lungs removed, washed in PBS, and  
243 minced into small pieces. The lungs were then digested for 1 hour with RPMI  
244 1640 supplemented with 10% FBS, 1 mg/ml Type II collagenase (Worthington),  
245 and 50 U/ml Deoxyribonuclease I (Worthington) at 37 $^{\circ}$  C/ 5% CO $_2$ . Single-cell  
246 suspensions were obtained by mashing the digested lungs, and the red blood  
247 cells were removed by treatment with a hypotonic lysis buffer (Lonza). Cells were  
248 analyzed using flow cytometry. Intracellular cytokine staining (ICS) was  
249 performed using the Cytotfix/Cytoperm kit (BD Biosciences). GolgiPlug was  
250 added to the digestion media and following red blood cell lysis, the cells were  
251 incubated with RPMI 1640 supplemented with 10% FBS and Golgi Plug for 3  
252 more hours at 37 $^{\circ}$  C/ 5% CO $_2$ . Cells were surface stained with anti-mouse CD45  
253 (clone 30-F11, eBioscience), Ly6G (clone 1A8, BD Biosciences) and CD73

254 (Clone TY/11.8, eBioscience). For intracellular staining, cells were permeabilized  
255 and stained with IL-10 (clone JES5-16E3, eBioscience) or isotype control (Rat  
256 IgG2b K Isotype Control, Biolegend). Fluorescence intensities were measured on  
257 a FACSCalibur and at least 25,000 events for lung tissue were analyzed using  
258 FlowJo.

259

### 260 *2.9 Adoptive transfer of PMNs*

261 Bone marrow PMNs were isolated from uninfected mice using density gradient  
262 centrifugation as described above and resuspended in PBS. Mice either received  
263  $2.5 \times 10^6$  cells via intraperitoneal (i.p.) injection as previously described (29) or  
264 mock-treated (PBS). One hour post-transfer, mice were challenged i.t. with  $5 \times 10^5$   
265 CFU of *S. pneumoniae*. Mice were euthanized at 24 hours post infection, and the  
266 lungs, brain, and blood were collected and plated on blood agar plates for CFU.  
267 The presence of transferred PMNs in the circulation of recipient mice was  
268 confirmed by flowcytometry (Fig S1).

269

### 270 *2.10 Blocking IL-10 in vivo*

271 Mice were treated with 0.1mg/mouse of IL-10 blocking antibody (JES52A5,  
272 Biolegend) or the isotype control (Rat IgG1 K Isotype Control, Biolegend) through  
273 i.p. injection. After 2 hours, mice were then challenged i.t. with  $5 \times 10^5$  CFU of *S.*  
274 *pneumoniae*. The lungs and blood were collected two days post-infection to  
275 determine bacterial burden.

276

## 277 2.11 Assays with human PMNs

278 Young (23-38 years old), male and female healthy human volunteers were  
279 recruited in accordance with The University at Buffalo Human Investigation  
280 Review Board (IRB) and signed informed consent forms. Individuals taking  
281 medication, reporting symptoms of infection within the last 2 weeks or that were  
282 pregnant were excluded from the study. Whole blood was obtained using acid  
283 citrate/dextrose as an anti-coagulant. PMNs were isolated using a 2% gelatin  
284 sedimentation technique as previously described (30) which allows for isolation  
285 of active PMNs with ~90% purity.  $5 \times 10^5$  PMNs were treated with the selective  
286 and competitive inhibitor of CD73,  $\alpha, \beta$  methylene ADP (1 or  $10 \mu\text{M}$ ) or DMSO  
287 vehicle control for 30 minutes at  $37^\circ \text{C}$ . The PMNs were then infected with  $10^3$   
288 CFU *S. pneumoniae* pre-opsonized in 10% (v/v) baby rabbit serum (Pel-Freeze)  
289 for 45 minutes at  $37^\circ \text{C}$  with rotation. Samples were then placed on ice to stop the  
290 process of opsonophagocytosis followed by serial dilution and plating on blood  
291 agar plates to enumerate viable CFU. The percentage of bacterial killing was  
292 calculated relative to no PMN controls incubated under the same treatment  
293 conditions.

294

## 295 2.12 mRNA measurement

296 RNA was extracted from  $2 \times 10^6$  human PMNs using the RNeasy Mini Kit (Qiagen)  
297 as per manufacturer's protocol. TURBO DNA-free kit (Invitrogen) was used to  
298 digest DNA from the RNA samples prior conversion into cDNA. RNA  
299 concentration and 260/280 ratio were determined using Nano-drop (Thermo

300 Fischer Scientific). For each sample, 500ng of RNA was converted into cDNA  
301 using SuperScript VILO™ cDNA synthesis kit (Life Technologies) according to  
302 the manufacturer's protocol. RT-PCR was performed using CFX96 Touch™  
303 Real-Time PCR Detection System from Bio-Rad and CT (cycle thresh-hold)  
304 values were determined using the following TaqMan probes from Life  
305 Technologies (Thermo Fischer Scientific): GAPDH (human Hs99999905\_m1)  
306 and IL-10 (human Hs00961622\_m1). Each sample was run in duplicates. Data  
307 were analyzed by the comparative threshold cycle ( $2^{-\Delta CT}$ ) method, normalizing  
308 the CT values obtained for IL-10 expression to those for GAPDH of the same  
309 sample. For comparison of IL-10 levels upon infection, relative quantity of  
310 transcripts (RQ) values were calculated by the  $\Delta\Delta CT$  method by using the  
311 formula  $RQ = 2^{-\Delta\Delta CT}$  (31). The  $\Delta\Delta CT$  values were obtained by subtracting  
312  $\Delta CT$  value of the infected (test) from that of the uninfected control.

313

### 314 *2.13 Statistics*

315 All statistical analysis was performed using Prism7 (Graph Pad). CFU data were  
316 log-transformed to normalize distribution. For all graphs, the mean values +/- SD  
317 are shown. Significant differences were determined by 2-way ANOVA followed  
318 by Sidak's multiple comparisons test or Student's t-test where  $p$  values less than  
319 0.05 were considered significant (as indicated by asterisks). Pearson test was  
320 used to determine correlation.

321

### 322 **Online Supplemental Material**

323 *Adenosine measurement*

324 Blood was collected from mice by venipuncture in microtainer tubes. The tubes  
325 were centrifuged at 9000rpm for 2 minutes and the sera obtained. Adenosine  
326 level in the sera was measured using the Adenosine Assay Fluorometric Kit  
327 (BioVision) as per manufacturer's instructions.

328

329 *Bacterial uptake and intracellular killing assay*

330 To determine uptake/phagocytosis and intracellular killing by PMNs, we  
331 performed a gentamicin-protection assay. Isolated PMNs from uninfected mice  
332 were incubated with pre-opsonized wild type or  $\Delta$ PLY *S. pneumoniae* (MOI=2) for  
333 10 minutes at 37°C. Gentamycin (100ug/ml) was then added for 40 minutes to kill  
334 extracellular bacteria. The reactions were washed three times with HBSS and  
335 resuspended in 100ul HBSS/0.1% gelatin. To measure initial bacterial uptake,  
336 the reactions were diluted and plated on blood agar plates and the percentage of  
337 the input inoculum that was engulfed was calculated. To determine intracellular  
338 killing, the reactions were returned to 37°C and incubated for 30 minutes and 90  
339 minutes. The reactions were diluted and plated on blood agar plates and the  
340 percentage of the engulfed inoculum (at 10 minutes) that was killed was then  
341 calculated.

342

343 *Myeloperoxidase (MPO) levels, Neutrophil Elastase and Cathepsin G activity*  
344 *assays*

345 1x10<sup>6</sup> Bone marrow PMNs were treated with adenosine, anti-IL-10 or rIL-10 or  
346 mock treated with HBSS/0.1% gelatin for 30 minutes at 37° C. The PMNs were  
347 then infected with pre-opsonized *S. pneumoniae* TIGR4 at a MOI of 2 or mock  
348 treated with buffer containing 3% mouse sera (uninfected) for 45 minutes at 37°  
349 C. The reactions were spun down and the supernatants were used to measure  
350 neutrophil elastase and cathepsin G activities as well as MPO levels with the  
351 Neutrophil Elastase Activity Assay Kit Fluorometric (Abcam), the Cathepsin G  
352 Activity Assay Kit (Abcam) and MPO ELISA (Invitrogen) respectively (30). The  
353 cells were lysed with lysis buffer containing 1% Triton-X, 50mM Tris, 0.1% SDS,  
354 0.5% sodium deoxycholate and 150mM NaCl. MPO levels in the pellets were  
355 also measured by ELISA.

356

#### 357 *Apoptosis Assay*

358 PMNs were pre-treated with buffer or incubated with anti-IL-10 or rIL-10 for 30  
359 minutes at 37° C then infected with pre-opsonized *S. pneumoniae* TIGR4 at a  
360 MOI of 2 or mock treated with buffer containing 3% mouse sera (uninfected) for  
361 45 minutes at 37° C. The percentage of apoptotic cells were then determined by  
362 flow cytometry using the FITC Annexin V apoptosis detection kit with PI  
363 (BioLegend) following manufacturer's instructions.

364

#### 365 *Tracking of transferred PMNs*

366 Bone marrow PMNs were isolated from uninfected CD73<sup>-/-</sup> or wildtype mice using  
367 density gradient centrifugation and then labeled with CellTracker Green (CMFDA



368 (5-Chloromethylfluorescein Diacetate) and CellTracker Orange (CMTMR (5-(and-  
369 6)-4-Chloromethyl Benzoyl Amino Tetramethylrhodamine) respectively  
370 as previously described (22). CD73<sup>-/-</sup> mice were then injected with a 1:1 ratio of  
371 PMNs from each strain (1x10<sup>6</sup> cells) via intraperitoneal (i.p.) injection. Three  
372 hours post transfer, recipient mice were euthanized, blood collected and the  
373 presence of transferred cells assessed by flow cytometry.

374

### 375 **3. Results**

#### 376 **3.1 CD73 expression on PMNs decreases over the course of infection**

377 We previously found that PMNs are required for protection at the  
378 beginning of *S. pneumoniae* lung infection (3), but are detrimental at later times.  
379 To test if there was a correlation between PMN numbers in the lungs and  
380 bacterial burden, we infected young C57BL/6 mice intra-tracheally (i.t.) with  
381 5x10<sup>5</sup> colony-forming units (CFU) of *S. pneumoniae* TIGR4 strain. We then  
382 monitored the bacterial burden and pulmonary influx of PMNs and performed  
383 correlation analysis between PMN number and lung CFU for 0-12 hours vs. 18-  
384 72 hours following infection. We found that PMN influx into the lungs strongly  
385 correlated with a decrease in bacterial burden for the first 12 hours following  
386 infection (Fig 1A left panel, R-squared =0.71,  $p=0.0001$ ). However, there was no  
387 correlation between PMN presence in the lungs and bacterial numbers for the  
388 remainder of the infection (Fig 1A right panel) suggesting that PMNs are no  
389 longer able to control the infection.

390 To determine if this was associated with a difference in the phenotype of  
391 pulmonary PMNs over time, we monitored the expression of the EAD-producing  
392 enzyme CD73 on PMNs in the lungs following challenge. We found that in the  
393 first 18 hours of infection, the majority (~75-80%) of PMNs in the lungs expressed  
394 CD73 (Fig. 1B). However, both the percentage of PMNs expressing CD73 and  
395 the amount (measured by the mean fluorescent intensity or MFI) of CD73  
396 expressed on PMNs in the lungs significantly dropped over the course of  
397 infection. CD73 expression had dropped to half by 72 hours and the drop started  
398 to occur after 12 hours post-infection, a time point after which PMN presence in  
399 the lungs no longer correlated with control of bacterial numbers (Fig 1A) (3). The  
400 decrease of CD73 expression also occurred on circulating PMNs and bone  
401 marrow PMNs (Fig. 1C), suggesting that this was a systemic decrease and not  
402 only localized in the lungs. A recent study identified a population of PMNs in the  
403 spleen with intermediate expression of Ly6G on their surface that exhibited a  
404 lowered ability to engulf *S. pneumoniae* during i.v. infection (32). When we  
405 compared Ly6G expression, we found that CD73 positive pulmonary PMNs had  
406 significantly higher expression of Ly6G (MFI) on their surface at all the time  
407 points tested (Fig. 1D). These data show that there are changes in PMNs over  
408 the course of pneumococcal pneumonia and that low CD73 expression on PMNs  
409 may be indicative of a PMN subset that is associated with lower anti-microbial  
410 activity.  
411

412 **3.2 CD73 and extracellular adenosine are required for the ability of PMNs to**  
413 **kill *S. pneumoniae***

414 We previously found that EAD production and signaling is required for  
415 protection against *S. pneumoniae* lung infection (3, 33). To test if EAD production  
416 has a role in anti-pneumococcal function of PMNs, we compared *ex vivo*  
417 opsonophagocytic killing of pneumococci by PMNs isolated from the bone  
418 marrow of CD73<sup>-/-</sup> or wild type C57BL/6 (WT) mice. Strikingly, CD73<sup>-/-</sup> PMNs  
419 completely failed to kill *S. pneumoniae*. In fact, the presence of these PMNs  
420 promoted an increase in bacterial numbers as indicated by negative bacterial  
421 killing on the graph (Fig. 2A). To test if the inability of CD73<sup>-/-</sup> PMNs to kill  
422 bacteria was due to a defect in EAD production, we added adenosine to the  
423 opsonophagocytic reactions. Adenosine levels in the sera of WT mice varied, but  
424 on average increased five-fold to 52.6 +/- 29.0 μM upon pneumococcal infection  
425 as measured by a fluorometric kit (Fig S 2A). We found that supplementing  
426 CD73<sup>-/-</sup> PMNs with EAD at 100 μM (closer to the higher levels found in infected  
427 mice) restored the ability of these cells to kill bacteria back to levels comparable  
428 with WT PMNs. Addition of exogenous EAD had no significant effect on bacterial  
429 killing by WT PMNs (Fig 2A). However, when we pharmacologically inhibited  
430 CD39 or CD73, the enzymes required for sequential dephosphorylation of  
431 extracellular ATP to EAD, we observed a significant reduction in the ability of WT  
432 PMNs to kill *S. pneumoniae* (Fig 2B). We confirmed that the difference in killing  
433 observed was not due to difference in bacterial survival in WT versus CD73<sup>-/-</sup>

434 sera or direct toxic effects of EAD (Fig. S2B and C) or the inhibitors on bacterial  
435 viability as previously described (3).

436 To test the clinical relevance of our findings, we tested the effect of CD73  
437 inhibition on the anti-bacterial activity of PMNs from human donors. PMNs were  
438 isolated from the blood of young healthy donors and treated with the CD73  
439 inhibitor or vehicle control *in vitro* and their ability to kill pneumococci was  
440 assessed. We found that in over half (i.e. 4 out of 7) of the donors tested, CD73  
441 inhibition completely abrogated the ability of PMNs to kill pneumococci and in  
442 fact promoted bacterial growth in the presence of PMNs instead (Fig. 2C). These  
443 findings demonstrate that production of EAD by CD73 is required for the ability of  
444 PMNs to kill pneumococci.

445

### 446 **3.3 Adoptive transfer of PMNs from wild type mice boosts resistance of** 447 **CD73<sup>-/-</sup> mice to *S. pneumoniae***

448 To test the role of EAD production by PMNs *in vivo*, we adoptively  
449 transferred 2.5x10<sup>6</sup> PMNs isolated from WT or CD73<sup>-/-</sup> mice into CD73<sup>-/-</sup> mice,  
450 one hour later infected the mice with 5x10<sup>5</sup> CFU of *S. pneumoniae* i.t. and then  
451 compared bacterial burdens in the lung, blood and brain at 24 hours post  
452 infection. We found that transfer of WT PMNs significantly reduced the systemic  
453 spread of pneumococci and resulted in a 50 and 5-fold reduction in blood and  
454 brain bacterial loads respectively (Fig. 3B and C) when compared to no transfer  
455 controls. In fact, bacteremia in CD73<sup>-/-</sup> mice that had received WT PMNs was  
456 comparable to that observed in WT controls (Fig 3B). Transfer of WT PMNs had

457 no significant effect on bacterial numbers in the lungs of CD73<sup>-/-</sup> recipients (Fig.  
458 3A). Surprisingly, we found that adoptive transfer of CD73<sup>-/-</sup> PMNs worsened  
459 susceptibility to infection and resulted in a ~10-fold increase in bacterial numbers  
460 in all sites (lung, blood, brain) tested (Fig. 3A-C) in CD73<sup>-/-</sup> recipients when  
461 compared to no transfer controls. WT mice that received CD73<sup>-/-</sup> PMNs also had a  
462 slight (but not statistically significant) increase in pulmonary bacterial numbers  
463 (Fig. 3A). This was consistent with our *in vitro* findings where bacterial numbers  
464 increased in the presence of CD73<sup>-/-</sup> PMNs. These findings suggest that CD73  
465 expression by PMNs is required and sufficient to promote resistance to *S.*  
466 *pneumoniae* infection.

467

#### 468 **3.4 Extracellular adenosine blocks IL-10 production by PMNs following *S.*** 469 ***pneumoniae* infection**

470 EAD was previously shown to play a role in regulating production of  
471 cytokines by immune cells (34) including IL-10 by macrophages (35-37). IL-10 is  
472 an anti-inflammatory cytokine whose production early on during pneumococcal  
473 infection was reported to be detrimental for host resistance (10). To test whether  
474 EAD was targeting IL-10, we compared IL-10 production by WT and CD73<sup>-/-</sup>  
475 PMNs upon *in vitro* infection with *S. pneumoniae*. We found that at baseline,  
476 PMNs from both mice strains produced some IL-10 but there was no significant  
477 difference in levels. However, upon infection, within the 45 minute timeframe of  
478 our *in vitro* assays, CD73<sup>-/-</sup> PMNs produced significantly more IL-10 as compared  
479 to WT PMNs (Fig. 4A). Further, while WT PMNs did not upregulate IL-10

480 production upon pneumococcal infection, CD73<sup>-/-</sup> PMNs displayed a ~ 2.5-fold  
481 increase in IL-10 above resting baseline levels (Fig 4A and B). Importantly, this  
482 upregulation was significantly blunted upon exposure to extracellular adenosine  
483 (Fig. 4B). When we examined PMNs isolated from three human donors, we could  
484 not detect any upregulation in IL-10 mRNA in response to *S. pneumoniae*  
485 infection (data not shown). These findings show that, in contrast to wild type  
486 PMNs, CD73-deficient PMNs produce IL-10 in response to *S. pneumoniae*, and  
487 that the induction of IL-10 production upon infection can be blocked by EAD.

488

### 489 **3.5 Pulmonary PMNs from CD73<sup>-/-</sup> mice produce IL-10 early on during *S.*** 490 ***pneumoniae* infection**

491 Next, we wanted to test the relevance of our findings *in vivo* and assess  
492 IL-10 production during lung infection. WT B6 and CD73<sup>-/-</sup> mice were infected i.t.  
493 with 5x10<sup>5</sup> CFU of *S. pneumoniae* TIGR4 and IL-10 production by pulmonary  
494 PMNs was monitored following infection by intracellular cytokine staining. We  
495 focused on the first 18 hours of infection since that is when PMNs are most  
496 relevant for the control of bacterial numbers. When we gated on PMNs (Ly6G+;  
497 see Fig. S3 for the gating strategy), we found that a low percentage (~6%) of  
498 PMNs in the lungs of WT mice expressed IL-10 and similar to our observations *in*  
499 *vitro*, there was no increase in IL-10 production upon infection (Fig. 4C and D)  
500 within the first 6 hours. However, at this timepoint, we observed a significant  
501 increase in IL-10 production by pulmonary PMNs in CD73<sup>-/-</sup> mice. The  
502 percentage of IL-10 producing CD73<sup>-/-</sup> PMNs increased from 5% at baseline to

503 20% (Fig. 4C) and the amount of IL-10 produced (measured by MFI) increased  
504 approximately 1.5-fold (Fig. 4D). When we compared the number of PMNs  
505 producing IL-10, we found that in CD73<sup>-/-</sup> mice, there is a significant increase in  
506 IL-10 producing PMNs above baseline by 6 hours post-infection. This increased  
507 IL-10 production by CD73<sup>-/-</sup> PMNs was not due to higher bacterial numbers, as  
508 we had previously found that at 6 hours post-infection bacterial burdens in WT  
509 and CD73<sup>-/-</sup> mice were equivalent and differences in bacterial control became  
510 apparent after that timepoint (3).

511 In contrast, in WT mice, we did not observe an increase in IL-10 producing  
512 PMNs until 18 hours following infection (Fig 4C-E). Further, as compared to  
513 CD73<sup>-/-</sup> mice, WT controls had 6-fold and 2-fold fewer PMNs making IL-10 at 6  
514 and 18 hours after lung challenge, respectively (Fig 4E). When we measured  
515 total IL-10 production in the lungs at 6 hours following infection, we found that  
516 CD73<sup>-/-</sup> mice had on average more IL-10 (231.9 +/-20.51 pg/ml) as compared to  
517 WT mice (190 +/- 86.65 pg/ml), but the difference did not reach statistical  
518 significance. These findings show that upon lung infection, in the absence of  
519 CD73, IL-10 production by pulmonary PMNs is higher and occurs more rapidly.

520

### 521 **3.6 Blocking IL-10 prior to infection rescues the susceptibility of CD73<sup>-/-</sup>** 522 **mice to pneumococcal lung infection**

523 To test whether the early increase in IL-10 production by PMNs in CD73<sup>-/-</sup>  
524 mice contribute to their susceptibility to infection, we treated the mice with either  
525 isotype control or an IL-10 blocking antibody 2 hours prior to infection. Mice were

526 then challenged i.t. with  $5 \times 10^5$  CFU of *S. pneumoniae*, and bacterial burdens in  
527 the lung and blood were determined two days post-infection. Blocking IL-10 prior  
528 to infection significantly boosted the resistance of CD73<sup>-/-</sup> mice resulting in a 20  
529 and 24-fold reduction in bacterial numbers in the lung and blood respectively as  
530 compared to isotype treated controls (Fig 5A and B). Importantly, blocking IL-10  
531 in CD73<sup>-/-</sup> mice rendered bacterial burdens in these mice indistinguishable from  
532 those of WT mice (Fig 5A and B). In WT mice, blocking IL-10 prior to infection  
533 had no significant effect on bacterial burden (Fig 5A and B). Our data suggest  
534 that the increased susceptibility of CD73<sup>-/-</sup> mice during pneumococcal infection is  
535 in part mediated by increased IL-10 production.

536

### 537 **3.7 IL-10 impairs the ability of PMNs to kill *S. pneumoniae***

538 Although the role of IL-10 during *S. pneumoniae* infection in mice is well  
539 established (10-12, 38), its effect on PMN anti-pneumococcal function has not  
540 been elucidated. To test that, WT PMNs were treated with either recombinant IL-  
541 10 or IL-10 blocking antibody and their ability to kill pneumococci measured in  
542 our *in vitro* opsonophagocytic assay. We found that addition of IL-10 abrogated  
543 the ability of WT PMNs to kill pneumococci while blocking this cytokine slightly  
544 boosted the anti-bacterial efficiency of PMNs (Fig 5C).

545 To test whether the anti-bacterial activity of CD73<sup>-/-</sup> PMNs can be rescued  
546 by targeting IL-10, we treated the PMNs with the IL-10 blocking antibody and  
547 performed the opsonophagocytic assay. We found that blocking IL-10 restored  
548 the pneumococcal killing ability of CD73<sup>-/-</sup> PMNs to WT levels (Fig 5C). To test if



549 the ability of adenosine to rescue CD73<sup>-/-</sup> PMN function was dependent on  
550 inhibiting IL-10, we added recombinant IL-10 to CD73<sup>-/-</sup> PMNs supplemented with  
551 adenosine. We found that the addition of recombinant IL-10 had no discernable  
552 effect on bacterial killing by CD73<sup>-/-</sup> PMNs, consistent with the (already high)  
553 levels of IL-10 produced by these cells (Fig 5C). However, the addition of IL-10  
554 prevented the ability of adenosine to boost the anti-microbial function of these  
555 cells (Fig 5C). These findings demonstrate that EAD's ability to inhibit IL-10  
556 production is crucial for the anti-pneumococcal function of PMNs.

557

### 558 **3.8 CD73 has no effect on PMN viability, bacterial uptake, intracellular** 559 **killing or enzymes in primary granules**

560 We next wanted to identify how CD73, EAD and IL-10 were regulating the  
561 ability of PMNs to kill *S. pneumoniae*. Bacterial uptake was previously shown to  
562 be important for killing by PMNs (4, 5). To test if EAD production was affecting  
563 bacterial phagocytosis, we used a gentamicin-protection assay where gentamicin  
564 was added following PMN infection with opsonized pneumococci to kill any  
565 extracellular bacteria. We found that the pneumococcal pore forming toxin  
566 pneumolysin (PLY) underestimated the true numbers of intracellular bacteria (Fig.  
567 S4A) in the gentamicin protection assays, but had no effect on susceptibility to  
568 the antibiotic (Fig. S4B) or overall opsonophagocytic killing by PMNs as  
569 previously described (39) (Fig. S4C). We therefore proceeded with using *S.*  
570 *pneumoniae*  $\Delta$ PLY to compare phagocytosis between WT and CD73<sup>-/-</sup> PMNs. To  
571 differentiate uptake from intracellular killing, we looked early at 10 minutes post

572 infection, and found no significant difference in the percentage of engulfed  
573 bacteria between the different mouse strains (Fig. S4D). We also found that the  
574 engulfed bacteria were very efficiently killed by both WT and CD73<sup>-/-</sup> PMNs (Fig.  
575 S4E). We observed 50% and 100% of the engulfed inoculum being killed by  
576 PMNs at 30 and 90 minutes post-uptake respectively. We also tested the effect  
577 of IL-10 on the association of PMNs with GFP-expressing pneumococci and  
578 found that neither addition nor blocking of IL-10 altered association (data not  
579 shown). These findings suggest that CD73/EAD do not affect bacterial uptake or  
580 intracellular killing by PMNs.

581 Components of PMN primary granules including serine protease such as  
582 cathepsin G (CG) and neutrophil elastase (NE) (4, 5) as well as myeloperoxidase  
583 (MPO) (40) were shown to be important for the ability of PMNs to kill *S.*  
584 *pneumoniae*. We therefore measured if CD73, EAD and IL-10 altered the  
585 activities of serine proteases Cathepsin G and NE. We were unable to detect  
586 Cathepsin G enzymatic activity either at baseline or upon pneumococcal infection  
587 in any of the samples we collected. NE activity was easily detected; however, we  
588 found no significant difference in NE activity between WT and CD73<sup>-/-</sup> PMNs at  
589 baseline or upon infection. Further, addition of adenosine, recombinant IL-10 or  
590 the IL-10 blocking antibody did not alter this response (Fig S5A). When we  
591 measured MPO levels, we found that pneumococcal infection significantly  
592 increased the amounts of intracellular and released MPO (Fig S5B and C) as  
593 previously reported (40). However, there was no difference in the amount of  
594 MPO between WT and CD73<sup>-/-</sup> PMNs, nor were its levels altered by blocking or

595 adding IL-10 (Fig S5B and C). These findings show that CD73, EAD and IL-10  
596 had no effect on the primary granule components NE or MPO.

597 It was previously reported that IL-10 producing PMNs were apoptotic (41).  
598 Since cellular death pathways including apoptosis and necrosis are known to  
599 play a role in the anti-bacterial function of PMNs (42), we compared the  
600 percentage of apoptotic and necrotic cells using Annexin V and propidium iodide  
601 staining and flow cytometry. We found that as expected (43), pneumococcal  
602 infection induced pore formation and necrosis of PMNs (PI and Annexin V double  
603 positive cells) (Fig S6). However, there was no difference in viability of PMNs at  
604 baseline or upon infection between WT and CD73<sup>-/-</sup> PMNs. Addition or inhibition  
605 of IL-10 did not further alter the percentage of necrotic PMNs (Fig S6). These  
606 findings suggest that CD73, EAD and IL-10 do not affect PMN viability.

607

### 608 **3.9 CD73 and IL-10 regulate extracellular ROS production by PMNs upon *S.*** 609 ***pneumoniae* infection**

610 IL-10 was reported to down-regulate reactive oxygen species (ROS)  
611 production by PMNs (18). To determine whether the CD73/IL-10 axis regulated  
612 ROS production upon pneumococcal infection, we first compared production of  
613 ROS by WT and CD73<sup>-/-</sup> PMNs. We first measured ROS levels using luminol,  
614 which is cell permeable and detects intracellular ROS. We found that the  
615 infection up regulated ROS production rapidly within minutes to more than 50-  
616 fold increase around the peak of the response at the 25 minute mark in both  
617 strains of mice (Fig. 6A). There was no significant difference in intracellular ROS

618 levels by WT vs CD73<sup>-/-</sup> PMNs in response to pneumococcal infection, consistent  
619 with our findings that bacterial uptake and intracellular killing was not affected by  
620 CD73.

621 As PLY forms pores that can lead to the release of products from PMNs,  
622 we next examined levels of ROS using isoluminol and HRP which can detect  
623 extracellular ROS. In uninfected PMNs, no ROS production was observed (Fig.  
624 6B). However, upon exposure to pneumococci, ROS was rapidly induced by  
625 PMNs from both strains of mice. This response was immediate and peaked  
626 within the first five minutes of infection and waned over time (Fig. 6B) as  
627 previously described (24). Importantly, during the first 10 minutes, PMNs from B6  
628 mice released significantly higher levels of extracellular ROS than CD73<sup>-/-</sup> PMNs,  
629 producing 3-fold higher levels of ROS at the peak of the response (Fig. Fig. 6B at  
630 the 5 minute mark). Extracellular ROS levels by PMNs in response to the  
631 positive control PMA was not different between mouse strains (not shown),  
632 indicating that the blunted response observed in CD73<sup>-/-</sup> PMNs was not due to a  
633 general defect in ROS production, but rather was specific to pneumococcal  
634 infection.

635 To determine if IL-10 had a role in production of ROS by PMNs, we added  
636 recombinant IL-10 to B6 PMNs. We found that this cytokine significantly blunted  
637 the magnitude of the ROS response during pneumococcal infection, which is  
638 consistent with its reported anti-inflammatory role (18) (Fig. 6C). Next we tested  
639 whether ROS production by CD73<sup>-/-</sup> PMNs upon infection can be rescued by  
640 treating the PMNs with the IL-10 blocking antibody. We found that blocking IL-10

641 significantly boosted extracellular ROS levels in infected CD73<sup>-/-</sup> PMNs, resulting  
642 in around a 2-fold increase at the peak of the response at 5 minutes post  
643 infection (Fig. 6D). Similarly, addition of adenosine significantly boosted ROS  
644 responses by infected CD73<sup>-/-</sup> PMNs (Fig. 6D). Taken together, these data  
645 demonstrate that inhibition of IL-10 production by CD73 is important for an  
646 optimal ROS response by PMNs during *S. pneumoniae* infection.

647

### 648 **3.10 ROS detoxification is important for the ability of *S. pneumoniae* to** 649 **resist killing by WT but not CD73<sup>-/-</sup> PMNs**

650 The role of ROS production by NADPH oxidase in the function of PMNs  
651 against pneumococci is unclear (32, 44). Consistent with previous reports (4),  
652 when we treated PMNs with DPI, which inhibits ROS production by flavoenzymes  
653 such as NADPH oxidase, we found no effect on the ability of these cells to kill *S.*  
654 *pneumoniae* (Fig 7A). However, when we used ascorbic acid, an anti-oxidant that  
655 scavenges ROS (45) or EUK 134 which detoxifies ROS by mimicking the activity  
656 of superoxide dismutase and catalase (46), the ability of WT PMNs to kill *S.*  
657 *pneumoniae* was completely abrogated (Fig 7A). We also tested *S. pneumoniae*  
658 that lack manganese-dependent superoxide dismutase ( $\Delta sodA$ ), the major SOD  
659 enzyme in *S. pneumoniae* that degrades superoxide radicals (47). We found that  
660 this bacterial mutant was significantly more susceptible to killing by PMNs from  
661 C57BL/6 mice as compared to wildtype *S. pneumoniae* (Fig 7A and B). Addition  
662 of EUK 134 or ascorbic acid reversed the susceptibility of  $\Delta sodA$  *S. pneumoniae*  
663 to killing by PMNs (Fig 7A). None of the compounds tested had a direct effect on

664 bacterial viability (not shown). These findings suggest that *S. pneumoniae* are  
665 susceptible to killing by ROS produced by PMNs.

666         When we tested CD73<sup>-/-</sup> PMNs, we did not observe any increase in killing  
667 of  $\Delta$ sodA *S. pneumoniae* (Fig 7B), which was expected given the blunted ROS  
668 response by these PMNs. To test if the presence of ROS is important for the  
669 ability of adenosine to rescue CD73<sup>-/-</sup> PMN function, we used EUK 134 or  
670 ascorbic acid. We found that the ability of adenosine to boost the anti-  
671 pneumococcal activity of these cells was lost when ROS was removed (Fig 7C).  
672 These findings suggest that the presence of ROS is important for EAD's ability to  
673 promote the anti-pneumococcal function of PMNs.

674

#### 675 **4. Discussion**

676         There is mounting evidence that PMNs are plastic and display phenotypic  
677 and functional heterogeneity under different disease states (48). These range  
678 from traditional pro-inflammatory subsets during infections (13, 48) to B-helper  
679 PMNs (32, 49) to suppressive phenotypes in tumor microenvironments (50, 51)  
680 and anti-inflammatory in response certain pathogens and microbial products (13-  
681 16, 52-54). In the context of pneumococcal pneumonia, we previously found that  
682 the efficacy of PMNs during the course of disease changes from clearing bacteria  
683 early on to promoting infection at later time points (3). Here we show that this  
684 shift away from an anti-microbial phenotype is associated with a decrease in  
685 CD73 expression on PMNs. Using *in vitro* bacterial killing assays and adoptive  
686 transfer of PMNs into CD73<sup>-/-</sup> recipients, we found that CD73 expression on

687 PMNs was crucial for the ability of these cells to kill *S. pneumoniae* and mediate  
688 protection during lung infection *in vivo*. In fact, loss of CD73 expression on PMNs  
689 seem to actively promote bacterial growth as *S. pneumoniae* grew in the  
690 presence of CD73<sup>-/-</sup> PMNs *in vitro* and adoptive transfer of CD73<sup>-/-</sup> PMNs  
691 worsened the infection resulting in increased bacterial burdens in recipient mice.  
692 Importantly, inhibition of CD73 *in vitro* abrogated the ability of human PMNs to kill  
693 pneumococci in 60% of donors tested, highlighting the clinical relevance of this  
694 pathway. These findings suggest that CD73 regulates the PMN antimicrobial  
695 phenotype.

696       During systemic infection with *S. pneumoniae*, a subset of immature  
697 PMNs with a lower expression of surface Ly6G that exhibited a low ability to bind  
698 bacteria was observed immobilized in the spleen (32). When we followed Ly6G  
699 expression on PMNs (gated on Ly6G positive cells) over time, we noticed it  
700 changed over time where we observed an increase in Ly6G expression on  
701 pulmonary PMNs recruited at the 6 hour time point followed by a subsequent  
702 decrease after that. However, we observed that CD73-negative PMNs in the  
703 lungs had significantly lower amounts of Ly6G on their surface as compared to  
704 their CD73<sup>+</sup> counterparts at all time points suggesting that they could denote a  
705 less mature subset. We believe that these CD73-negative pulmonary PMNs  
706 migrate from the circulation after originating from the bone marrow, as the  
707 reduced expression of CD73 following infection was also observed on circulating  
708 PMNs as well as the PMN pool in the bone marrow.



709 In exploring mechanisms of how CD73 controls the PMN antimicrobial  
710 phenotype, we found that it inhibited IL-10 production in response to  
711 pneumococcal infection. In wild type mice, we did not see any up regulation in IL-  
712 10 production by PMNs early in infection. IL-10 producing PMNs only started to  
713 accumulate at the 18h time point that coincided with a decrease in CD73 on  
714 pulmonary PMNs and their inability to control bacterial numbers (3). In contrast,  
715 PMNs from CD73<sup>-/-</sup> mice up regulated IL-10 production early on within 6 hours of  
716 infection. Our IL-10 blocking experiments both *in vitro* and *in vivo* suggest that  
717 this early IL-10 production impaired the ability of CD73<sup>-/-</sup> mice to control infection.  
718 Our data align with previous reports that administration of IL-10 early in infection  
719 impairs the ability of the host to control pneumococcal numbers (10). However,  
720 studies have also found that mice that lack IL-10 had exacerbated PMN influx in  
721 their lungs (12, 38) and succumbed to the infection despite having lower bacterial  
722 burden in their organs (12). These findings suggest that early production of IL-10  
723 is deleterious for the host's ability to control the infection, however, it may be  
724 required later on for resolution of inflammation and return to homeostasis.  
725 Therefore, the eventual accumulation of IL-10 producing PMNs in wild type mice  
726 we observed here may be beneficial in resolution of pulmonary inflammation  
727 observed in healthy hosts (3).

728 Murine PMNs have been described to produce IL-10 in sepsis models and  
729 in response to several bacterial infections such as *Escherichia coli*, *Shigella*  
730 *flexneri* (16) and *Staphylococcus aureus* (13) as well as parasitic infections such  
731 as *Leishmania major* (14) and *Trypanosoma cruzi* (15). In contrast, IL-10



732 production by pulmonary PMNs was actively repressed during *Mycobacterium*  
733 *tuberculosis* (55). In this study, we did not detect an up regulation in IL-10  
734 production by PMNs in response to *S. pneumoniae* infection in wild type mice  
735 either *in vivo* during lung challenge or *in vitro* in response to direct bacterial  
736 infection. Further, we were unable to detect an increase in IL-10 mRNA in PMNs  
737 isolated from human donors in response to stimulation with *S. pneumoniae*. This  
738 fits with previous studies demonstrating that resting human PMNs have histone  
739 modifications at the IL-10 locus rendering it transcriptionally silent (56) and that  
740 induction of IL-10 production by PMNs requires further stimulation such as direct  
741 contact with LPS-treated Tregs or IL-10 itself that promote histone  
742 posttranslational modifications that can activate IL-10 transcription (41).

743 Our data suggests that IL-10 production by PMNs in response to *S.*  
744 *pneumoniae* is actively suppressed by EAD production by CD73. This is in  
745 contrast to what has been described for macrophages. Adenosine induced IL-10  
746 production by macrophages in response to LPS stimulation (36, 37) or *E. coli*  
747 infection (35) by acting via the A2A or A2B receptor to facilitate binding of  
748 transcription factors to the IL-10 locus and enhancing transcription (35) or via  
749 posttranscriptional modifications of the 3'-UTR that facilitated translation (36)  
750 respectively. These differences observed could be accounted for by the cell type  
751 i.e. macrophages vs. PMNs or the stimulation where the macrophage studies  
752 have been performed with Gram-negative bacteria and their products (LPS) while  
753 we are examining responses to a Gram-positive organism.

754 Phagocytosis and serine proteases were shown to contribute to the ability  
755 of PMNs kill *S. pneumoniae* (4). In exploring how the CD73/IL-10 axis regulated  
756 PMN anti-pneumococcal activity we found that apoptosis, bacterial uptake and  
757 intracellular killing and production of anti-microbial Neutrophil Elastase and  
758 Myeloperoxidase were not affected by this pathway. Rather, inhibition of IL-10  
759 production by CD73 was crucial for optimal production of extracellular ROS by  
760 PMNs upon *S. pneumoniae* infection. Importantly, the presence of ROS was  
761 required for the ability of adenosine to rescue bacterial killing by CD73<sup>-/-</sup> PMNs.  
762 This is in line with previous findings that adenosine signaling via the A1 receptor  
763 enhanced superoxide production by PMNs in response to antibody coated  
764 erythrocytes (57) and that IL-10 blunted PMN superoxide production in response  
765 to PMA and *C. albicans* hyphae (18, 19).

766 We found here that the bacterial infection triggered ROS production by  
767 PMNs similar to what has been reported (24, 58). ROS detoxification is crucial for  
768 pneumococcal survival in host environments (59) as bacterial mutants lacking  
769 components that detoxify ROS die more readily in response to oxidative stress  
770 (60-63). Similarly, we found that  $\Delta$ sodA *S. pneumoniae*, which lacks the enzyme  
771 superoxide dismutase, a manganese-dependent enzyme that detoxifies  
772 superoxide radicals (47), is more susceptible to killing by PMNs. Importantly, this  
773 susceptibility was reversed upon the exogenous addition of compounds that  
774 remove ROS. This highlighted the importance of ROS detoxification for the ability  
775 of *S. pneumoniae* to resist killing by PMNs. NADPH oxidase is a major source of  
776 ROS in PMNs (64). However, when we used DPI to inhibit NADPH oxidase, we

777 saw no effect on bacterial killing by wildtype PMNs. This is in line with previous  
778 work showing that mice lacking components of the NADPH oxidase are not more  
779 susceptible to pneumococcal lung infection (32, 44) and that using DPI to inhibit  
780 respiratory burst has no effect on the ability of PMNs to kill *S. pneumoniae* (4).  
781 Intriguingly, when we used EUK134 and ascorbic acid to detoxify or scavenge  
782 ROS respectively (45, 46), the ability of PMNs to kill *S. pneumoniae* was  
783 significantly impaired. These findings suggest that ROS is important for bacterial  
784 killing, however, NADPH oxidase may not be the only source of ROS in PMNs.  
785 Cellular ROS can be produced from several sources other than NADPH oxidase  
786 including the mitochondrial respiratory chain, lipoxygenases, cyclooxygenases  
787 among others (65). In fact, previous work found that the NADPH oxidase inhibitor  
788 DPI reduced, but did not completely abrogate ROS production by PMNs in  
789 response to pneumococcal infection (40). Pneumococcal infection is known to  
790 activate cellular lipoxygenases and cyclooxygenases and these enzymes which  
791 are expressed by leukocytes but are not inhibited by DPI (6, 66-69), may act as  
792 an alternate sources of ROS.

793 Adenosine is a well-known regulator of PMN function and is known to  
794 regulate PMN recruitment, release of inflammatory cytokines, phagocytic  
795 capacity and oxidative burst (34). However, the majority of those studies have  
796 been conducted in the context of sterile inflammation or in response to *in vitro*  
797 stimulation by inflammatory mediators such as fMLP, LPS, TNF or inert particles  
798 (34). The role of the EAD pathway in PMN response to infections is now better  
799 appreciated and was shown to play a role in host resistance during pulmonary

800 infections with influenza A virus (70, 71), *Klebsiella pneumoniae* (72) and *S.*  
801 *pneumoniae* (3). Here, we identified the mechanisms by which EAD production  
802 by CD73 regulated PMN anti-pneumococcal function and further found it was  
803 relevant for the function of PMNs from human donors. This may be relevant for  
804 incorporating clinically available adenosine-based drugs to combat  
805 pneumococcal pneumonia and other serious lung infections in the future.

806

### 807 **Authorship**

808 NS and JNL conducted research, analyzed data and wrote the paper. MB, EYIT,  
809 JHY and SER conducted research, JML provided essential expertise and  
810 reviewed the paper. ENBG designed research, conducted research, analyzed  
811 data, wrote the paper and had primary responsibility for final content.

812

### 813 **Acknowledgments**

814 We would like to acknowledge Andrew Camilli for bacterial strains and Joan  
815 Mecsas for ROS detection protocols. This work was supported by National  
816 Institute of Health grant R00AG051784 to ENBG.

817

### 818 **Conflict of Interest Disclosure**

819 None

820

### 821 **References**

- 822 1. Garvy BA, Harmsen AG. The importance of neutrophils in resistance to  
823 pneumococcal pneumonia in adult and neonatal mice. *Inflammation*.  
824 1996;20(5):499-512. Epub 1996/10/01. PubMed PMID: 8894714.
- 825 2. Rolston KV. The spectrum of pulmonary infections in cancer patients.  
826 *Current opinion in oncology*. 2001;13(4):218-23. Epub 2001/06/29. PubMed  
827 PMID: 11429477.
- 828 3. Bou Ghanem EN, Clark S, Roggensack SE, McIver SR, Alcaide P,  
829 Haydon PG, et al. Extracellular Adenosine Protects against *Streptococcus*  
830 *pneumoniae* Lung Infection by Regulating Pulmonary Neutrophil Recruitment.  
831 *PLoS pathogens*. 2015;11(8):e1005126. Epub 2015/08/28. doi:  
832 10.1371/journal.ppat.1005126. PubMed PMID: 26313746; PubMed Central  
833 PMCID: PMC4552087.
- 834 4. Standish AJ, Weiser JN. Human neutrophils kill *Streptococcus*  
835 *pneumoniae* via serine proteases. *J Immunol*. 2009;183(4):2602-9. Epub  
836 2009/07/22. doi: 10.4049/jimmunol.0900688. PubMed PMID: 19620298.
- 837 5. Hahn I, Klaus A, Janze AK, Steinwede K, Ding N, Bohling J, et al.  
838 Cathepsin G and neutrophil elastase play critical and nonredundant roles in lung-  
839 protective immunity against *Streptococcus pneumoniae* in mice. *Infect Immun*.  
840 2011;79(12):4893-901. Epub 2011/09/14. doi: 10.1128/IAI.05593-11. PubMed  
841 PMID: 21911460; PubMed Central PMCID: PMC3232647.
- 842 6. Bhowmick R, Tin Maung NH, Hurley BP, Ghanem EB, Gronert K,  
843 McCormick BA, et al. Systemic disease during *Streptococcus pneumoniae* acute  
844 lung infection requires 12-lipoxygenase-dependent inflammation. *J Immunol*.

- 845 2013;191(10):5115-23. Epub 2013/10/04. doi: 10.4049/jimmunol.1300522.  
846 PubMed PMID: 24089193; PubMed Central PMCID: PMC3836588.
- 847 7. Bou Ghanem EN, Clark S, Du X, Wu D, Camilli A, Leong JM, et al. The  
848 alpha-tocopherol form of vitamin E reverses age-associated susceptibility to  
849 streptococcus pneumoniae lung infection by modulating pulmonary neutrophil  
850 recruitment. *J Immunol.* 2015;194(3):1090-9. Epub 2014/12/17. doi:  
851 10.4049/jimmunol.1402401. PubMed PMID: 25512603; PubMed Central PMCID:  
852 PMC4834212.
- 853 8. Thompson LF, Eltzschig HK, Ibla JC, Van De Wiele CJ, Resta R, Morote-  
854 Garcia JC, et al. Crucial role for ecto-5'-nucleotidase (CD73) in vascular leakage  
855 during hypoxia. *The Journal of experimental medicine.* 2004;200(11):1395-405.  
856 Epub 2004/12/08. doi: 10.1084/jem.20040915. PubMed PMID: 15583013;  
857 PubMed Central PMCID: PMC1237012.
- 858 9. Hasko G, Linden J, Cronstein B, Pacher P. Adenosine receptors:  
859 therapeutic aspects for inflammatory and immune diseases. *Nature reviews Drug*  
860 *discovery.* 2008;7(9):759-70. Epub 2008/09/02. doi: 10.1038/nrd2638. PubMed  
861 PMID: 18758473; PubMed Central PMCID: PMC2568887.
- 862 10. van der Poll T, Marchant A, Keogh CV, Goldman M, Lowry SF. Interleukin-  
863 10 impairs host defense in murine pneumococcal pneumonia. *J Infect Dis.*  
864 1996;174(5):994-1000. Epub 1996/11/01. PubMed PMID: 8896500.
- 865 11. van der Sluijs KF, van Elden LJ, Nijhuis M, Schuurman R, Pater JM,  
866 Florquin S, et al. IL-10 is an important mediator of the enhanced susceptibility to

- 867 pneumococcal pneumonia after influenza infection. *J Immunol.*  
868 2004;172(12):7603-9. Epub 2004/06/10. PubMed PMID: 15187140.
- 869 12. Penalzoa HF, Nieto PA, Munoz-Durango N, Salazar-Echegarai FJ, Torres  
870 J, Parga MJ, et al. Interleukin-10 plays a key role in the modulation of neutrophils  
871 recruitment and lung inflammation during infection by *Streptococcus*  
872 *pneumoniae*. *Immunology.* 2015;146(1):100-12. Epub 2015/06/03. doi:  
873 10.1111/imm.12486. PubMed PMID: 26032199; PubMed Central PMCID:  
874 PMC4552505.
- 875 13. Tsuda Y, Takahashi H, Kobayashi M, Hanafusa T, Herndon DN, Suzuki F.  
876 Three different neutrophil subsets exhibited in mice with different susceptibilities  
877 to infection by methicillin-resistant *Staphylococcus aureus*. *Immunity.*  
878 2004;21(2):215-26. Epub 2004/08/17. doi: 10.1016/j.immuni.2004.07.006.  
879 PubMed PMID: 15308102.
- 880 14. Charmoy M, Megnekou R, Allenbach C, Zweifel C, Perez C, Monnat K, et  
881 al. *Leishmania major* induces distinct neutrophil phenotypes in mice that are  
882 resistant or susceptible to infection. *J Leukoc Biol.* 2007;82(2):288-99. Epub  
883 2007/04/24. doi: 10.1189/jlb.0706440. PubMed PMID: 17449725.
- 884 15. Tosello Boari J, Amezcua Vesely MC, Bermejo DA, Ramello MC, Montes  
885 CL, Cejas H, et al. IL-17RA signaling reduces inflammation and mortality during  
886 *Trypanosoma cruzi* infection by recruiting suppressive IL-10-producing  
887 neutrophils. *PLoS pathogens.* 2012;8(4):e1002658. Epub 2012/05/12. doi:  
888 10.1371/journal.ppat.1002658. PubMed PMID: 22577359; PubMed Central  
889 PMCID: PMC3343119.

- 890 16. Zhang X, Majlessi L, Deriaud E, Leclerc C, Lo-Man R. Coactivation of Syk  
891 kinase and MyD88 adaptor protein pathways by bacteria promotes regulatory  
892 properties of neutrophils. *Immunity*. 2009;31(5):761-71. Epub 2009/11/17. doi:  
893 10.1016/j.immuni.2009.09.016. PubMed PMID: 19913447.
- 894 17. Kasten KR, Muenzer JT, Caldwell CC. Neutrophils are significant  
895 producers of IL-10 during sepsis. *Biochemical and biophysical research  
896 communications*. 2010;393(1):28-31. Epub 2010/01/26. doi:  
897 10.1016/j.bbrc.2010.01.066. PubMed PMID: 20097159; PubMed Central PMCID:  
898 PMC2830356.
- 899 18. Laichalk LL, Danforth JM, Standiford TJ. Interleukin-10 inhibits neutrophil  
900 phagocytic and bactericidal activity. *FEMS immunology and medical  
901 microbiology*. 1996;15(4):181-7. Epub 1996/10/01. doi: 10.1111/j.1574-  
902 695X.1996.tb00084.x. PubMed PMID: 8908479.
- 903 19. Roilides E, Katsifa H, Tsaparidou S, Stergiopoulou T, Panteliadis C,  
904 Walsh TJ. Interleukin 10 suppresses phagocytic and antihyphal activities of  
905 human neutrophils. *Cytokine*. 2000;12(4):379-87. Epub 2000/05/11. doi:  
906 10.1006/cyto.1999.0567. PubMed PMID: 10805220.
- 907 20. Greene NG, Narciso AR, Filipe SR, Camilli A. Peptidoglycan Branched  
908 Stem Peptides Contribute to *Streptococcus pneumoniae* Virulence by Inhibiting  
909 Pneumolysin Release. *PLoS pathogens*. 2015;11(6):e1004996. Epub  
910 2015/06/27. doi: 10.1371/journal.ppat.1004996. PubMed PMID: 26114646;  
911 PubMed Central PMCID: PMC4483231.



- 912 21. Dalia AB, McDonough E, Camilli A. Multiplex genome editing by natural  
913 transformation. *Proc Natl Acad Sci U S A*. 2014;111(24):8937-42. Epub  
914 2014/06/04. doi: 10.1073/pnas.1406478111. PubMed PMID: 24889608; PubMed  
915 Central PMCID: PMCPMC4066482.
- 916 22. Swamydas M, Lionakis MS. Isolation, purification and labeling of mouse  
917 bone marrow neutrophils for functional studies and adoptive transfer  
918 experiments. *Journal of visualized experiments : JoVE*. 2013(77):e50586. Epub  
919 2013/07/31. doi: 10.3791/50586. PubMed PMID: 23892876; PubMed Central  
920 PMCID: PMC3732092.
- 921 23. Lysenko ES, Clarke TB, Shchepetov M, Ratner AJ, Roper DI, Dowson  
922 CG, et al. Nod1 signaling overcomes resistance of *S. pneumoniae* to  
923 opsonophagocytic killing. *PLoS pathogens*. 2007;3(8):e118. Epub 2007/08/29.  
924 doi: 10.1371/journal.ppat.0030118. PubMed PMID: 17722978; PubMed Central  
925 PMCID: PMC1950946.
- 926 24. Martner A, Dahlgren C, Paton JC, Wold AE. Pneumolysin released during  
927 *Streptococcus pneumoniae* autolysis is a potent activator of intracellular oxygen  
928 radical production in neutrophils. *Infect Immun*. 2008;76(9):4079-87. Epub  
929 2008/06/19. doi: 10.1128/IAI.01747-07. PubMed PMID: 18559434; PubMed  
930 Central PMCID: PMC2519426.
- 931 25. Dahlgren C, Follin P, Johansson A, Lock R, Orselius K. Localization of the  
932 luminol-dependent chemiluminescence reaction in human granulocytes. *Journal*  
933 *of bioluminescence and chemiluminescence*. 1989;4(1):263-6. Epub 1989/07/01.  
934 doi: 10.1002/bio.1170040137. PubMed PMID: 2552755.

- 935 26. Dahlgren C, Karlsson A. Respiratory burst in human neutrophils. Journal  
936 of immunological methods. 1999;232(1-2):3-14. Epub 2000/01/05. PubMed  
937 PMID: 10618505.
- 938 27. RajECKy M, Lojek A, Ciz M. Differentiating between intra- and extracellular  
939 chemiluminescence in diluted whole-blood samples. International journal of  
940 laboratory hematology. 2012;34(2):136-42. Epub 2011/08/13. doi:  
941 10.1111/j.1751-553X.2011.01370.x. PubMed PMID: 21834798.
- 942 28. Mook-Kanamori B, Geldhoff M, Troost D, van der Poll T, van de Beek D.  
943 Characterization of a pneumococcal meningitis mouse model. BMC infectious  
944 diseases. 2012;12:71. Epub 2012/03/30. doi: 10.1186/1471-2334-12-71. PubMed  
945 PMID: 22455545; PubMed Central PMCID: PMC3364848.
- 946 29. Ocuin LM, Bamboat ZM, Balachandran VP, Cavnar MJ, Obaid H, Plitas G,  
947 et al. Neutrophil IL-10 suppresses peritoneal inflammatory monocytes during  
948 polymicrobial sepsis. J Leukoc Biol. 2011;89(3):423-32. Epub 2010/11/26. doi:  
949 10.1189/jlb.0810479. PubMed PMID: 21106642; PubMed Central PMCID:  
950 PMCPMC3040467.
- 951 30. Bou Ghanem EN, Lee JN, Joma BH, Meydani SN, Leong JM, Panda A.  
952 The Alpha-Tocopherol Form of Vitamin E Boosts Elastase Activity of Human  
953 PMNs and Their Ability to Kill Streptococcus pneumoniae. Frontiers in cellular  
954 and infection microbiology. 2017;7:161. Epub 2017/05/19. doi:  
955 10.3389/fcimb.2017.00161. PubMed PMID: 28516066; PubMed Central PMCID:  
956 PMC5413490.

- 957 31. Livak KJ, Schmittgen TD. Analysis of relative gene expression data using  
958 real-time quantitative PCR and the 2(-Delta Delta C(T)) Method. *Methods*.  
959 2001;25(4):402-8. Epub 2002/02/16. doi: 10.1006/meth.2001.1262. PubMed  
960 PMID: 11846609.
- 961 32. Deniset JF, Surewaard BG, Lee WY, Kubes P. Splenic Ly6G(high) mature  
962 and Ly6G(int) immature neutrophils contribute to eradication of *S. pneumoniae*.  
963 *The Journal of experimental medicine*. 2017;214(5):1333-50. Epub 2017/04/21.  
964 doi: 10.1084/jem.20161621. PubMed PMID: 28424248; PubMed Central PMCID:  
965 PMC5413339.
- 966 33. Bhalla M, Hui Yeoh J, Lamneck C, Herring SE, Tchalla EYI, Heinzinger  
967 LR, et al. A1 adenosine receptor signaling reduces *Streptococcus pneumoniae*  
968 adherence to pulmonary epithelial cells by targeting expression of platelet-  
969 activating factor receptor. *Cellular microbiology*. 2019:e13141. Epub 2019/11/12.  
970 doi: 10.1111/cmi.13141. PubMed PMID: 31709673.
- 971 34. Barletta KE, Ley K, Mehrad B. Regulation of neutrophil function by  
972 adenosine. *Arteriosclerosis, thrombosis, and vascular biology*. 2012;32(4):856-  
973 64. Epub 2012/03/17. doi: 10.1161/ATVBAHA.111.226845. PubMed PMID:  
974 22423037; PubMed Central PMCID: PMC3353547.
- 975 35. Csoka B, Nemeth ZH, Virag L, Gergely P, Leibovich SJ, Pacher P, et al.  
976 A2A adenosine receptors and C/EBPbeta are crucially required for IL-10  
977 production by macrophages exposed to *Escherichia coli*. *Blood*.  
978 2007;110(7):2685-95. Epub 2007/05/26. doi: 10.1182/blood-2007-01-065870.  
979 PubMed PMID: 17525287; PubMed Central PMCID: PMC1988939.

- 980 36. Nemeth ZH, Lutz CS, Csoka B, Deitch EA, Leibovich SJ, Gause WC, et al.  
981 Adenosine augments IL-10 production by macrophages through an A2B  
982 receptor-mediated posttranscriptional mechanism. *J Immunol.*  
983 2005;175(12):8260-70. Epub 2005/12/13. PubMed PMID: 16339566; PubMed  
984 Central PMCID: PMC2000336.
- 985 37. Cohen HB, Briggs KT, Marino JP, Ravid K, Robson SC, Mosser DM. TLR  
986 stimulation initiates a CD39-based autoregulatory mechanism that limits  
987 macrophage inflammatory responses. *Blood.* 2013;122(11):1935-45. Epub  
988 2013/08/03. doi: 10.1182/blood-2013-04-496216. PubMed PMID: 23908469;  
989 PubMed Central PMCID: PMC3772500.
- 990 38. Williams AE, Jose RJ, Brown JS, Chambers RC. Enhanced inflammation  
991 in aged mice following infection with *Streptococcus pneumoniae* is associated  
992 with decreased IL-10 and augmented chemokine production. *American journal of*  
993 *physiology Lung cellular and molecular physiology.* 2015;308(6):L539-49. Epub  
994 2015/01/18. doi: 10.1152/ajplung.00141.2014. PubMed PMID: 25595646;  
995 PubMed Central PMCID: PMC4360060.
- 996 39. Benton KA, Everson MP, Briles DE. A pneumolysin-negative mutant of  
997 *Streptococcus pneumoniae* causes chronic bacteremia rather than acute sepsis  
998 in mice. *Infect Immun.* 1995;63(2):448-55. Epub 1995/02/01. PubMed PMID:  
999 7822009; PubMed Central PMCID: PMC173016.
- 1000 40. Xiang Y, Jin C, Wang W, Wang Z, Huang Y, Fan F, et al. The critical role  
1001 of myeloperoxidase in *Streptococcus pneumoniae* clearance and tissue damage

1002 during mouse acute otitis media. *Innate immunity*. 2017;23(3):296-306. Epub  
1003 2017/04/01. doi: 10.1177/1753425917693907. PubMed PMID: 28359218.

1004 41. Lewkowicz N, Mycko MP, Przygodzka P, Cwiklinska H, Cichalewska M,  
1005 Matysiak M, et al. Induction of human IL-10-producing neutrophils by LPS-  
1006 stimulated Treg cells and IL-10. *Mucosal immunology*. 2016;9(2):364-78. Epub  
1007 2015/07/30. doi: 10.1038/mi.2015.66. PubMed PMID: 26220165.

1008 42. McCracken JM, Allen LA. Regulation of human neutrophil apoptosis and  
1009 lifespan in health and disease. *Journal of cell death*. 2014;7:15-23. Epub  
1010 2014/10/04. doi: 10.4137/JCD.S11038. PubMed PMID: 25278783; PubMed  
1011 Central PMCID: PMC4167320.

1012 43. Zysk G, Bejo L, Schneider-Wald BK, Nau R, Heinz H. Induction of  
1013 necrosis and apoptosis of neutrophil granulocytes by *Streptococcus pneumoniae*.  
1014 *Clinical and experimental immunology*. 2000;122(1):61-6. Epub 2000/09/30.  
1015 PubMed PMID: 11012619; PubMed Central PMCID: PMC1905755.

1016 44. Marriott HM, Jackson LE, Wilkinson TS, Simpson AJ, Mitchell TJ, Buttle  
1017 DJ, et al. Reactive oxygen species regulate neutrophil recruitment and survival in  
1018 pneumococcal pneumonia. *American journal of respiratory and critical care  
1019 medicine*. 2008;177(8):887-95. Epub 2008/01/19. doi: 10.1164/rccm.200707-  
1020 990OC. PubMed PMID: 18202350; PubMed Central PMCID: PMC2643216.

1021 45. Guaiquil VH, Vera JC, Golde DW. Mechanism of vitamin C inhibition of  
1022 cell death induced by oxidative stress in glutathione-depleted HL-60 cells. *The  
1023 Journal of biological chemistry*. 2001;276(44):40955-61. Epub 2001/09/05. doi:  
1024 10.1074/jbc.M106878200. PubMed PMID: 11533037.

- 1025 46. Rong Y, Doctrow SR, Tocco G, Baudry M. EUK-134, a synthetic  
1026 superoxide dismutase and catalase mimetic, prevents oxidative stress and  
1027 attenuates kainate-induced neuropathology. *Proc Natl Acad Sci U S A*.  
1028 1999;96(17):9897-902. Epub 1999/08/18. doi: 10.1073/pnas.96.17.9897.  
1029 PubMed PMID: 10449791; PubMed Central PMCID: PMCPMC22307.
- 1030 47. Yesilkaya H, Kadioglu A, Gingles N, Alexander JE, Mitchell TJ, Andrew  
1031 PW. Role of manganese-containing superoxide dismutase in oxidative stress and  
1032 virulence of *Streptococcus pneumoniae*. *Infect Immun*. 2000;68(5):2819-26.  
1033 Epub 2000/04/18. doi: 10.1128/iai.68.5.2819-2826.2000. PubMed PMID:  
1034 10768978; PubMed Central PMCID: PMCPMC97493.
- 1035 48. Deniset JF, Kubes P. Neutrophil heterogeneity: Bona fide subsets or  
1036 polarization states? *J Leukoc Biol*. 2018;103(5):829-38. Epub 2018/02/21. doi:  
1037 10.1002/JLB.3RI0917-361R. PubMed PMID: 29462505.
- 1038 49. Puga I, Cols M, Barra CM, He B, Cassis L, Gentile M, et al. B cell-helper  
1039 neutrophils stimulate the diversification and production of immunoglobulin in the  
1040 marginal zone of the spleen. *Nature immunology*. 2011;13(2):170-80. Epub  
1041 2011/12/27. doi: 10.1038/ni.2194. PubMed PMID: 22197976; PubMed Central  
1042 PMCID: PMC3262910.
- 1043 50. Fridlender ZG, Sun J, Kim S, Kapoor V, Cheng G, Ling L, et al.  
1044 Polarization of tumor-associated neutrophil phenotype by TGF-beta: "N1" versus  
1045 "N2" TAN. *Cancer cell*. 2009;16(3):183-94. Epub 2009/09/08. doi:  
1046 10.1016/j.ccr.2009.06.017. PubMed PMID: 19732719; PubMed Central PMCID:  
1047 PMC2754404.

- 1048 51. Pillay J, Tak T, Kamp VM, Koenderman L. Immune suppression by  
1049 neutrophils and granulocytic myeloid-derived suppressor cells: similarities and  
1050 differences. *Cellular and molecular life sciences : CMLS*. 2013;70(20):3813-27.  
1051 Epub 2013/02/21. doi: 10.1007/s00018-013-1286-4. PubMed PMID: 23423530;  
1052 PubMed Central PMCID: PMC3781313.
- 1053 52. De Santo C, Arscott R, Booth S, Karydis I, Jones M, Asher R, et al.  
1054 Invariant NKT cells modulate the suppressive activity of IL-10-secreting  
1055 neutrophils differentiated with serum amyloid A. *Nature immunology*.  
1056 2010;11(11):1039-46. Epub 2010/10/05. doi: 10.1038/ni.1942. PubMed PMID:  
1057 20890286; PubMed Central PMCID: PMC3001335.
- 1058 53. Kamp VM, Pillay J, Lammers JW, Pickkers P, Ulfman LH, Koenderman L.  
1059 Human suppressive neutrophils CD16<sup>bright</sup>/CD62L<sup>dim</sup> exhibit decreased  
1060 adhesion. *J Leukoc Biol*. 2012;92(5):1011-20. Epub 2012/08/29. doi:  
1061 10.1189/jlb.0612273. PubMed PMID: 22927481.
- 1062 54. Pillay J, Kamp VM, van Hoffen E, Visser T, Tak T, Lammers JW, et al. A  
1063 subset of neutrophils in human systemic inflammation inhibits T cell responses  
1064 through Mac-1. *The Journal of clinical investigation*. 2012;122(1):327-36. Epub  
1065 2011/12/14. doi: 10.1172/JCI57990. PubMed PMID: 22156198; PubMed Central  
1066 PMCID: PMC3248287.
- 1067 55. Huynh JP, Lin CC, Kimmey JM, Jarjour NN, Schwarzkopf EA, Bradstreet  
1068 TR, et al. Bhlhe40 is an essential repressor of IL-10 during Mycobacterium  
1069 tuberculosis infection. *The Journal of experimental medicine*. 2018;215(7):1823-

- 1070 38. Epub 2018/05/19. doi: 10.1084/jem.20171704. PubMed PMID: 29773644;  
1071 PubMed Central PMCID: PMC6028511.
- 1072 56. Tamassia N, Zimmermann M, Castellucci M, Ostuni R, Bruderek K,  
1073 Schilling B, et al. Cutting edge: An inactive chromatin configuration at the IL-10  
1074 locus in human neutrophils. *J Immunol.* 2013;190(5):1921-5. Epub 2013/01/29.  
1075 doi: 10.4049/jimmunol.1203022. PubMed PMID: 23355741.
- 1076 57. Salmon JE, Cronstein BN. Fc gamma receptor-mediated functions in  
1077 neutrophils are modulated by adenosine receptor occupancy. A1 receptors are  
1078 stimulatory and A2 receptors are inhibitory. *J Immunol.* 1990;145(7):2235-40.  
1079 Epub 1990/10/01. PubMed PMID: 2168919.
- 1080 58. Barbuti G, Moschioni M, Fumarulo R, Censini S, Montemurro P.  
1081 *Streptococcus pneumoniae* modulates the respiratory burst response in human  
1082 neutrophils. *FEMS immunology and medical microbiology.* 2010;60(1):57-62.  
1083 Epub 2010/07/14. doi: 10.1111/j.1574-695X.2010.00716.x. PubMed PMID:  
1084 20618848.
- 1085 59. Yesilkaya H, Andisi VF, Andrew PW, Bijlsma JJ. *Streptococcus*  
1086 *pneumoniae* and reactive oxygen species: an unusual approach to living with  
1087 radicals. *Trends in microbiology.* 2013;21(4):187-95. Epub 2013/02/19. doi:  
1088 10.1016/j.tim.2013.01.004. PubMed PMID: 23415028.
- 1089 60. Pericone CD, Park S, Imlay JA, Weiser JN. Factors contributing to  
1090 hydrogen peroxide resistance in *Streptococcus pneumoniae* include pyruvate  
1091 oxidase (SpxB) and avoidance of the toxic effects of the fenton reaction. *Journal*



1092 of bacteriology. 2003;185(23):6815-25. Epub 2003/11/18. PubMed PMID:  
1093 14617646; PubMed Central PMCID: PMC262707.

1094 61. Tseng HJ, McEwan AG, Paton JC, Jennings MP. Virulence of  
1095 *Streptococcus pneumoniae*: PsaA mutants are hypersensitive to oxidative stress.  
1096 *Infect Immun*. 2002;70(3):1635-9. Epub 2002/02/21. PubMed PMID: 11854257;  
1097 PubMed Central PMCID: PMC127802.

1098 62. Eijkelkamp BA, Morey JR, Ween MP, Ong CL, McEwan AG, Paton JC, et  
1099 al. Extracellular zinc competitively inhibits manganese uptake and compromises  
1100 oxidative stress management in *Streptococcus pneumoniae*. *PloS one*.  
1101 2014;9(2):e89427. Epub 2014/02/22. doi: 10.1371/journal.pone.0089427.  
1102 PubMed PMID: 24558498; PubMed Central PMCID: PMC3928430.

1103 63. van Opijnen T, Camilli A. A fine scale phenotype-genotype virulence map  
1104 of a bacterial pathogen. *Genome research*. 2012;22(12):2541-51. Epub  
1105 2012/07/25. doi: 10.1101/gr.137430.112. PubMed PMID: 22826510; PubMed  
1106 Central PMCID: PMC3514683.

1107 64. Zeng MY, Miralda I, Armstrong CL, Uriarte SM, Bagaitkar J. The roles of  
1108 NADPH oxidase in modulating neutrophil effector responses. *Molecular oral  
1109 microbiology*. 2019;34(2):27-38. Epub 2019/01/12. doi: 10.1111/omi.12252.  
1110 PubMed PMID: 30632295.

1111 65. Nathan C, Cunningham-Bussel A. Beyond oxidative stress: an  
1112 immunologist's guide to reactive oxygen species. *Nature reviews Immunology*.  
1113 2013;13(5):349-61. Epub 2013/04/27. doi: 10.1038/nri3423. PubMed PMID:  
1114 23618831; PubMed Central PMCID: PMC3928430.

- 1115 66. N'Guessan PD, Hippenstiel S, Etouem MO, Zahlten J, Beermann W,  
1116 Lindner D, et al. Streptococcus pneumoniae induced p38 MAPK- and NF-  
1117 kappaB-dependent COX-2 expression in human lung epithelium. American  
1118 journal of physiology Lung cellular and molecular physiology. 2006;290(6):L1131-  
1119 8. Epub 2006/01/18. doi: 10.1152/ajplung.00383.2005. PubMed PMID:  
1120 16414978.
- 1121 67. Toniolo A, Buccellati C, Pinna C, Gaion RM, Sala A, Bolego C.  
1122 Cyclooxygenase-1 and prostacyclin production by endothelial cells in the  
1123 presence of mild oxidative stress. PloS one. 2013;8(2):e56683. Epub  
1124 2013/02/27. doi: 10.1371/journal.pone.0056683. PubMed PMID: 23441213;  
1125 PubMed Central PMCID: PMC3575487.
- 1126 68. Maloney CG, Kutchera WA, Albertine KH, McIntyre TM, Prescott SM,  
1127 Zimmerman GA. Inflammatory agonists induce cyclooxygenase type 2  
1128 expression by human neutrophils. J Immunol. 1998;160(3):1402-10. Epub  
1129 1998/05/07. PubMed PMID: 9570560.
- 1130 69. Nichols RC, Vanderhoek JY. Calcium regulation of the human PMN  
1131 cytosolic 15-lipoxygenase. Biochimica et biophysica acta. 1991;1085(1):77-81.  
1132 Epub 1991/08/20. doi: 10.1016/0005-2760(91)90234-9. PubMed PMID: 1892881.
- 1133 70. Aeffner F, Woods PS, Davis IC. Activation of A1-adenosine receptors  
1134 promotes leukocyte recruitment to the lung and attenuates acute lung injury in  
1135 mice infected with influenza A/WSN/33 (H1N1) virus. Journal of virology.  
1136 2014;88(17):10214-27. Epub 2014/06/27. doi: 10.1128/JVI.01068-14. PubMed  
1137 PMID: 24965449; PubMed Central PMCID: PMC4136329.

- 1138 71. Aeffner F, Woods PS, Davis IC. Ecto-5'-nucleotidase CD73 modulates the  
1139 innate immune response to influenza infection but is not required for  
1140 development of influenza-induced acute lung injury. *American journal of*  
1141 *physiology Lung cellular and molecular physiology*. 2015;309(11):L1313-22.  
1142 Epub 2015/10/04. doi: 10.1152/ajplung.00130.2015. PubMed PMID: 26432867;  
1143 PubMed Central PMCID: PMC4669338.
- 1144 72. Barletta KE, Cagnina RE, Burdick MD, Linden J, Mehrad B. Adenosine  
1145 A(2B) receptor deficiency promotes host defenses against gram-negative  
1146 bacterial pneumonia. *American journal of respiratory and critical care medicine*.  
1147 2012;186(10):1044-50. Epub 2012/09/22. doi: 10.1164/rccm.201204-0622OC.  
1148 PubMed PMID: 22997203; PubMed Central PMCID: PMC3530209.

1149

## 1150 **Figure Legends**

1151 **Figure 1. Expression of CD73 on pulmonary PMNs changes over the course**  
1152 **of infection.** C57BL/6 mice were inoculated i.t with  $5 \times 10^5$  CFU of *S. pneumoniae*  
1153 TIGR4. The blood, bone marrow and lungs were harvested, plated for bacterial  
1154 enumeration and analyzed by flow cytometry. (A) Mice were euthanized at 0, 6,  
1155 12, 18, 24 and 48 hours following infection. We then compared bacterial numbers  
1156 in the lungs to PMN numbers (Ly6G+ cells) for the first 0-12 and subsequent 18-  
1157 72 hours post infection and performed Pearson correlation analysis where  
1158 asterisks denote significant correlation. We gated on PMNs (Ly6G+ cells) and  
1159 also monitored (B) the percentage of cells expressing CD73 and (B-C) the  
1160 amounts of CD73 (mean fluorescent intensity or MFI) in the indicated organs, at

1161 the indicated time points. (D) We gated on all Ly6G<sup>+</sup> cells and then gated on  
1162 CD73 positive versus negative populations and compared the expression (MFI)  
1163 of Ly6G. Data are pooled from two separate experiments with 4-5 mice per time  
1164 point (A) and 4-7 mice per time point (B-D). Asterisks indicate significant  
1165 differences from uninfected controls calculated by Student's t-test.

1166

1167 **Figure 2. CD73 and extracellular adenosine are required for the ability of**  
1168 **neutrophils to kill *S. pneumoniae*.** (A) PMNs were isolated from the bone  
1169 marrow of C57BL/6 (WT) or CD73<sup>-/-</sup> mice and treated with 100 $\mu$ M Adenosine or  
1170 PBS (vehicle control) for 30 minutes at 37°C. (B) PMNs were isolated from the  
1171 bone marrow of C57BL/6 (WT) mice and treated with 100 $\mu$ M of the CD37  
1172 inhibitor ( $\alpha,\beta$  methylene ADP), 100 $\mu$ M of the CD39 inhibitor (POM-1) or PBS  
1173 (vehicle control-VC) for 30 minutes at 37°C. The reactions were then infected  
1174 with *S. pneumoniae* pre-opsonized with homologous sera for 45 minutes at 37°C.  
1175 Reactions were then stopped by placing samples on ice and viable CFU were  
1176 determined after serial dilution and plating. The percentage of bacteria killed  
1177 upon incubation with PMNs was determined by comparing surviving CFU to a no  
1178 PMN control. Positive percent killing indicates bacterial death while negative  
1179 percent indicates bacterial growth. Data shown are pooled from three separate  
1180 experiments (n=3 biological replicates or mice per strain) where each condition  
1181 was tested in triplicate (n=3 technical replicates) per experiment. Asterisks  
1182 indicate significance calculated by Student's t-test. (C) PMNs were isolated from  
1183 the blood of young healthy donors and pre-treated with the CD73 inhibitor ( $\alpha,\beta$

1184 methylene ADP) or vehicle control for 30 minutes at 37°C and then incubated for  
1185 45 minutes with complement-opsonized *S. pneumoniae* TIGR4. For each donor,  
1186 the average percent bacterial killing compared to a no PMN control was  
1187 calculated from triplicate wells per condition. Data from 7 donors are shown.  
1188 Significant differences denoted by asterisk, were determined by paired t-test.

1189

1190 **Figure 3. Adoptive transfer of PMNs from wild type mice boosts resistance**

1191 **of CD73<sup>-/-</sup> mice to *S. pneumoniae*.** C57BL/6 (WT) or CD73<sup>-/-</sup> mice were mock  
1192 treated (no transfer) or injected i.p with 2.5x10<sup>6</sup> of the indicated PMNs isolated  
1193 from the bone marrow of C57BL/6 or CD73<sup>-/-</sup> mice. One hour post transfer, mice  
1194 were infected i.t with 5x10<sup>5</sup> CFU of *S. pneumoniae* and bacterial numbers in the  
1195 lung (A), blood (B) and brain (C) were determined 24 hours post infection.  
1196 Significant differences, determined by Student's t-test, are indicated by asterisks.  
1197 Pooled data from n=5 mice per group are shown.

1198

1199 **Figure 4. CD73 inhibits IL-10 production from PMNs following**

1200 **pneumococcal infection.** (A) PMNs from the indicated mouse strains were  
1201 incubated for 45 minutes at 37°C with *S. pneumoniae* pre-opsonized with  
1202 homologous sera or mock treated with buffer and homologous sera (uninfected)  
1203 *in vitro*. The supernatants were then collected and assayed for IL-10 production  
1204 by ELISA. (B) PBS control or adenosine (100µM) were added to the PMNs 30  
1205 minutes prior to *in vitro* infection and the fold-change in IL-10 production was  
1206 calculated by dividing the values of infected reactions by uninfected controls for

1207 each condition. Data were pooled from three separate experiments (n=3 mice)  
1208 with each condition tested in triplicate per experiment. Asterisks indicate  
1209 significant differences determined by Student's t-test. (C-E) Wild-type C57BL/6 or  
1210 CD73<sup>-/-</sup> mice were mock-infected or i.t challenged with 5 x 10<sup>5</sup> CFU of *S.*  
1211 *pneumoniae*. Six (grey bars) and 18 hours (black bars) following challenge, (C)  
1212 the percentage of IL-10 producing PMNs (Ly6G+), (D) the mean florescent  
1213 intensities (MFI) of IL-10 in PMNs (Ly6G+) and (E) the number of IL-10 producing  
1214 PMNs (Ly6G+) recruited into the lungs were determined by intracellular cytokine  
1215 staining and flow cytometry (see Materials and Methods). Pooled data are from  
1216 three separate experiments (n=6-9 mice per strain per time point). Significant  
1217 differences determined by Student's t-test are indicated by asterisks.

1218

1219 **Figure 5. Blocking IL-10 rescues the anti-microbial function of CD73<sup>-/-</sup> PMNs**  
1220 **and reverses the susceptibility of CD73<sup>-/-</sup> mice to pneumococcal challenge.**

1221 (A-B) Wild-type (WT) C57BL/6 or CD73<sup>-/-</sup> mice were treated i.p with IL-10  
1222 blocking antibody JES5-2A5 (anti-IL-10) or isotype control two hours prior to  
1223 pulmonary challenge with 5x10<sup>5</sup> CFU of *S. pneumoniae*. Pneumococcal burdens  
1224 in the lungs (A) and blood (B) were determined 48 hours post-infection. Pooled  
1225 data from three separate experiments with (CD73<sup>-/-</sup> +/- anti-IL-10 n=8 mice; WT+  
1226 anti-IL-10 n=5 mice and WT + isotype n=13 mice per group) are shown. Values  
1227 significantly different by Student's t-test are indicated by asterisk. (C) PMNs from  
1228 C57BL/6 or CD73<sup>-/-</sup> mice were incubated for 20 minutes with the indicated anti-IL-  
1229 10 (1µg/ml JES5-2A5), isotype control (1µg/ml), rIL-10 (50ng/ml) or adenosine

1230 (100 $\mu$ M) and then infected with pre-opsonized *S. pneumoniae* for 45 minutes at  
1231 37°C. Reactions were then plated on blood agar plates and the percentage of  
1232 bacteria killed compared to a no PMN control under the same conditions was  
1233 calculated. Data shown are pooled from three separate experiments (n=3 mice  
1234 per strain) with each condition tested in triplicate. Asterisks indicate significant  
1235 differences determined by Student's t-test.

1236

1237 **Figure 6. Inhibition of IL-10 production by CD73 is important for optimal**  
1238 **production of reactive oxygen species by PMNs in response to *S.***

1239 ***pneumoniae* infection.** PMN were isolated from the bone marrow of the  
1240 indicated strains of mice and left untreated (A and B) or treated for 30 minutes  
1241 with the indicated rIL-10 (50ng/ml) (C) or 100 $\mu$ M Adenosine or anti-IL-10 (1 $\mu$ g/ml  
1242 JES5-2A5) or isotype control (1 $\mu$ g/ml) (D). PMNs were then infected with *S.*  
1243 *pneumoniae* pre-opsonized with homologous sera (+Sp) or treated with 3%  
1244 matching sera (uninfected) and intracellular ROS production measured by  
1245 chemiluminescence of Luminol (A) or extracellular ROS production measured by  
1246 chemiluminescence of Isoluminol in the presence of HRP (B-D). Representative  
1247 data are shown from one of six (B) and one of four (A, C-D) separate  
1248 experiments with one mouse per strain per experiment where each condition is  
1249 tested in quadruplicates. Significant differences ( $p<0.05$ ) were determined by 2-  
1250 way ANOVA followed by Sidak's multiple comparisons test.

1251

1252 **Figure 7. Detoxification of ROS is important for *S. pneumoniae* to resist**  
1253 **killing by wildtype, but not CD73<sup>-/-</sup> PMNs.** (A) PMNs isolated from the bone  
1254 marrow of C57BL/6 (WT) mice were treated with PBS (VC), 10 $\mu$ M DPI, EUK 134  
1255 (25 $\mu$ M) or Ascorbic acid (100 $\mu$ M) for 30 minutes at 37°C. (B) PMNs isolated from  
1256 the bone marrow of C57BL/6 (WT) or CD73<sup>-/-</sup> mice were left unmanipulated. (C)  
1257 PMNs isolated from the bone marrow of CD73<sup>-/-</sup> mice were treated with 100 $\mu$ M  
1258 adenosine in the absence or presence of EUK 134 or Ascorbic acid for 30  
1259 minutes at 37°C. (A-C) The PMNs were then infected with the indicated wild type  
1260 or  $\Delta$ sodA *S. pneumoniae* in the presence of homologous sera for 45 minutes at  
1261 37°C. Reactions were then stopped by placing samples on ice and viable CFU  
1262 were determined after serial dilution and plating. The percentage of bacteria  
1263 killed by comparing surviving CFU to a no PMN control under the same  
1264 conditions. Data shown are pooled from four separate experiments (n=4  
1265 biological replicates or mice per strain) where each condition was tested in  
1266 triplicate (n=3 technical replicates) per experiment. Asterisks indicate significance  
1267 calculated by Student's t-test.  
1268



| <b>Primer Name</b> | <b>Sequence (5' to 3')</b>                  |
|--------------------|---------------------------------------------|
| SP_0766_F1         | GGT CAA AAA CTC AGC GGC AGG AA              |
| SP_0766_R1         | CAA CTA TCA TTA CAT CTG TAA TAC CTC TTT TTC |
| SP_0766_F2         | TTA CAG ATG TAA TGA TAG TTG GAG GGA AG      |
| SP_0766_R2         | GCG TAC ACT CGA TTC CAA GAC TCA C           |
| SP_0766_ColonyPCRF | GCG ATT TGG TGA GAG ACT TG                  |
| SP_0766_ColonyPCRR | CAA ATG ATG CTC GCT TAG GG                  |
| OS38               | GGAGAACTTAAATGAATTGTAGAGGACATG              |
| OS39               | CTATGTGTTTCAGCTGACTCCCATG                   |

Table I. Primers used for generation of  $\Delta$ sodA *S. pneumoniae*

**Figure 1****A.**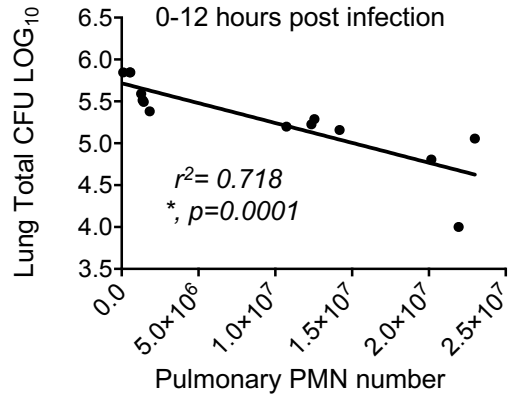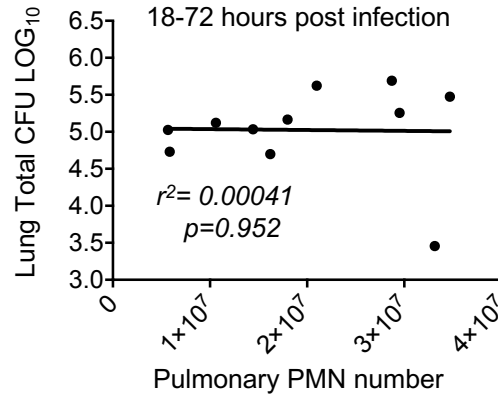**B.**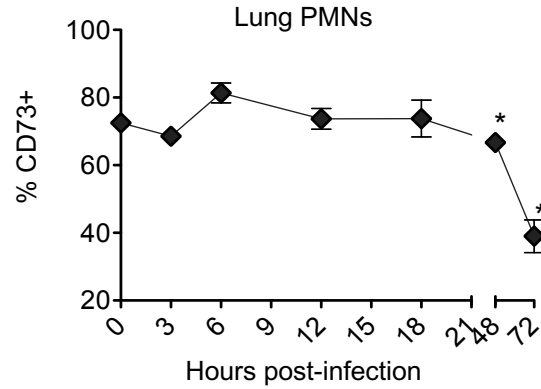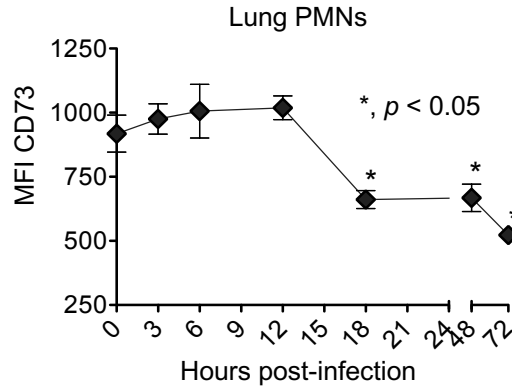**C.**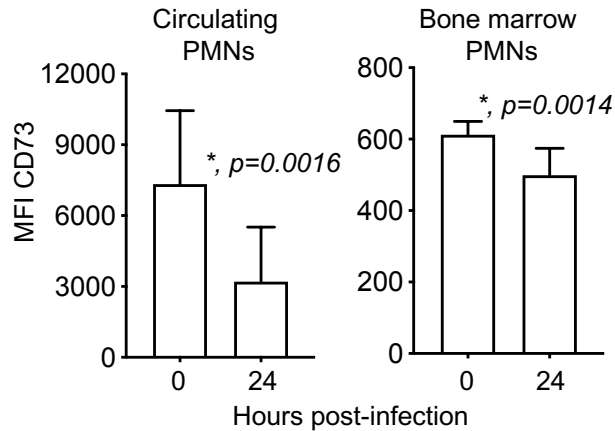**D.**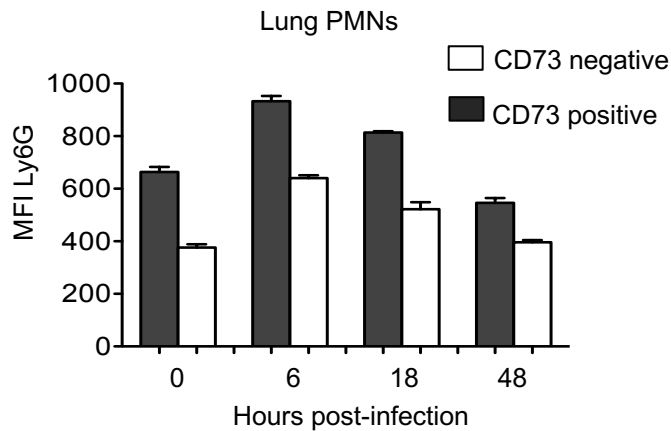

**Figure 2**

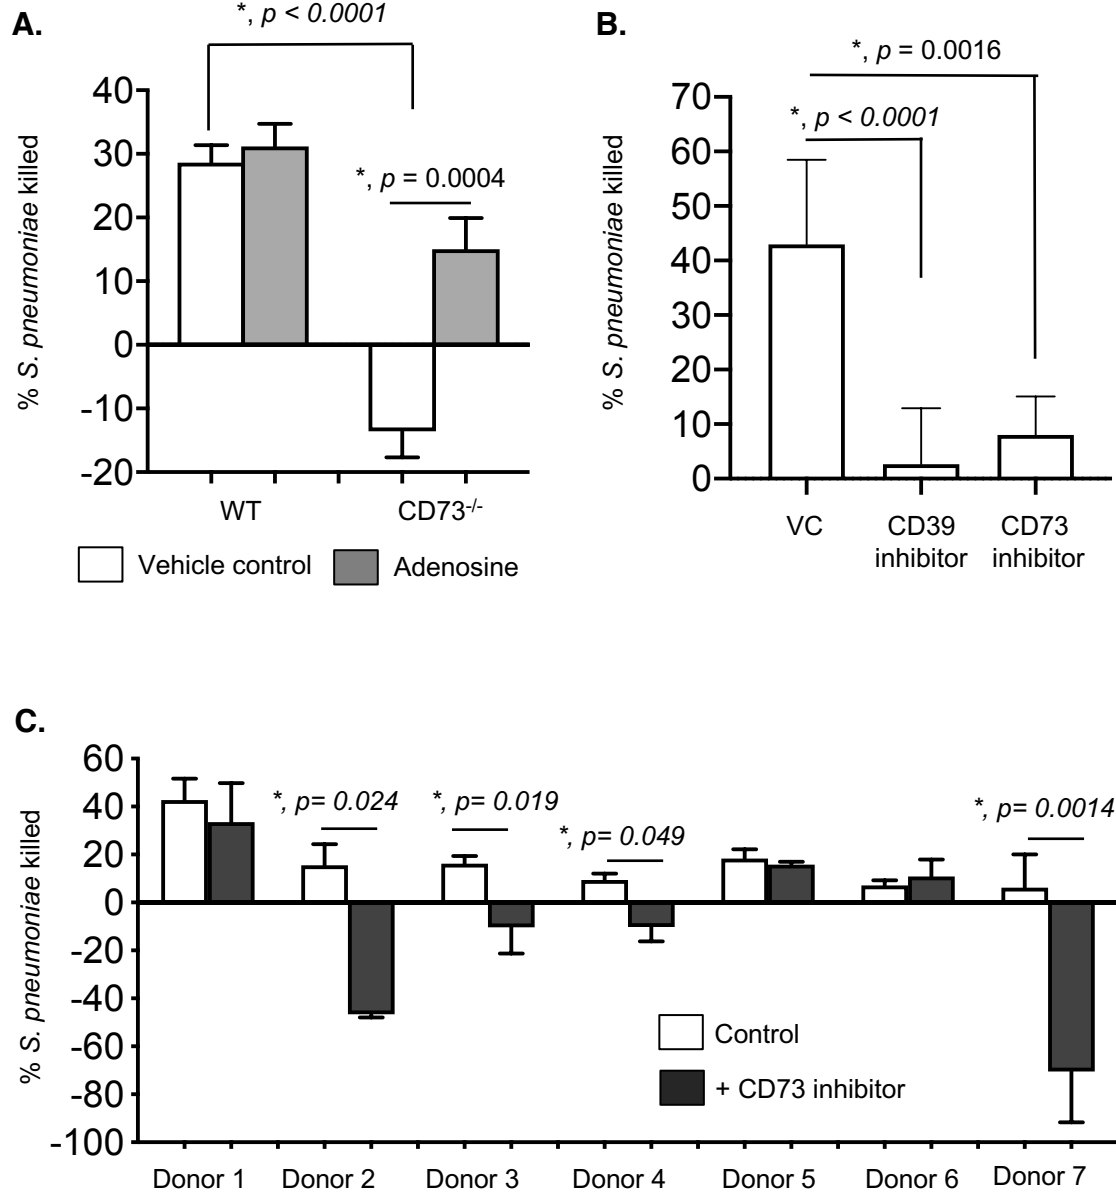

**Figure 3**

**A.**

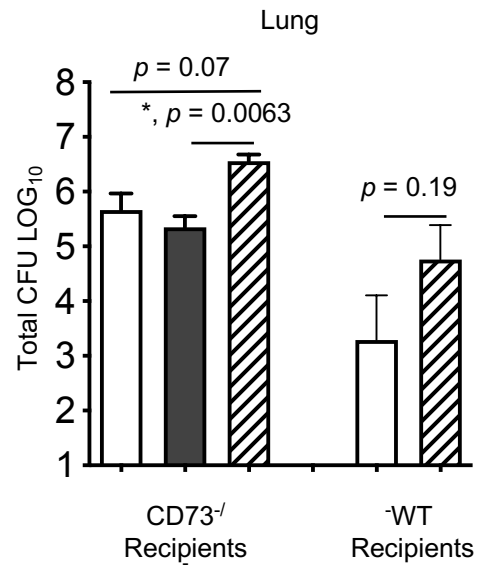

**B.**

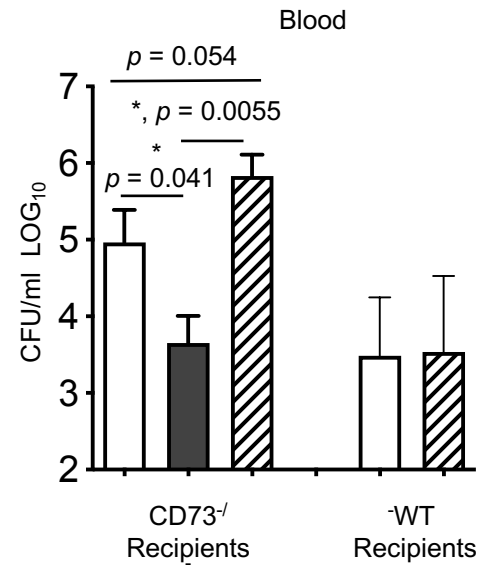

**C.**

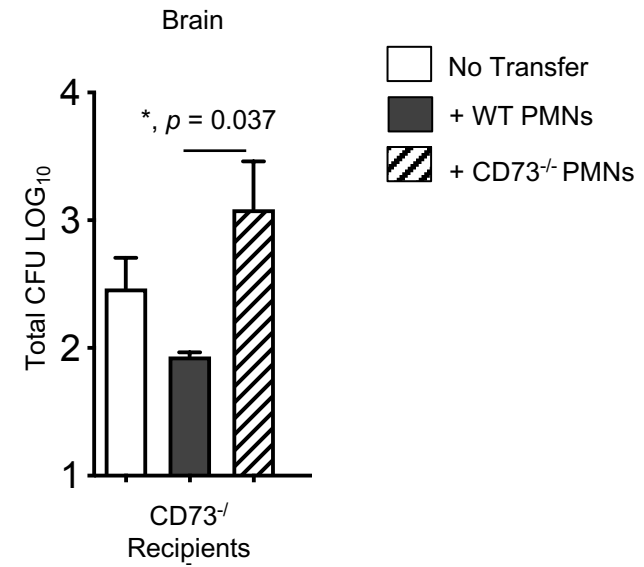

**Figure 4**

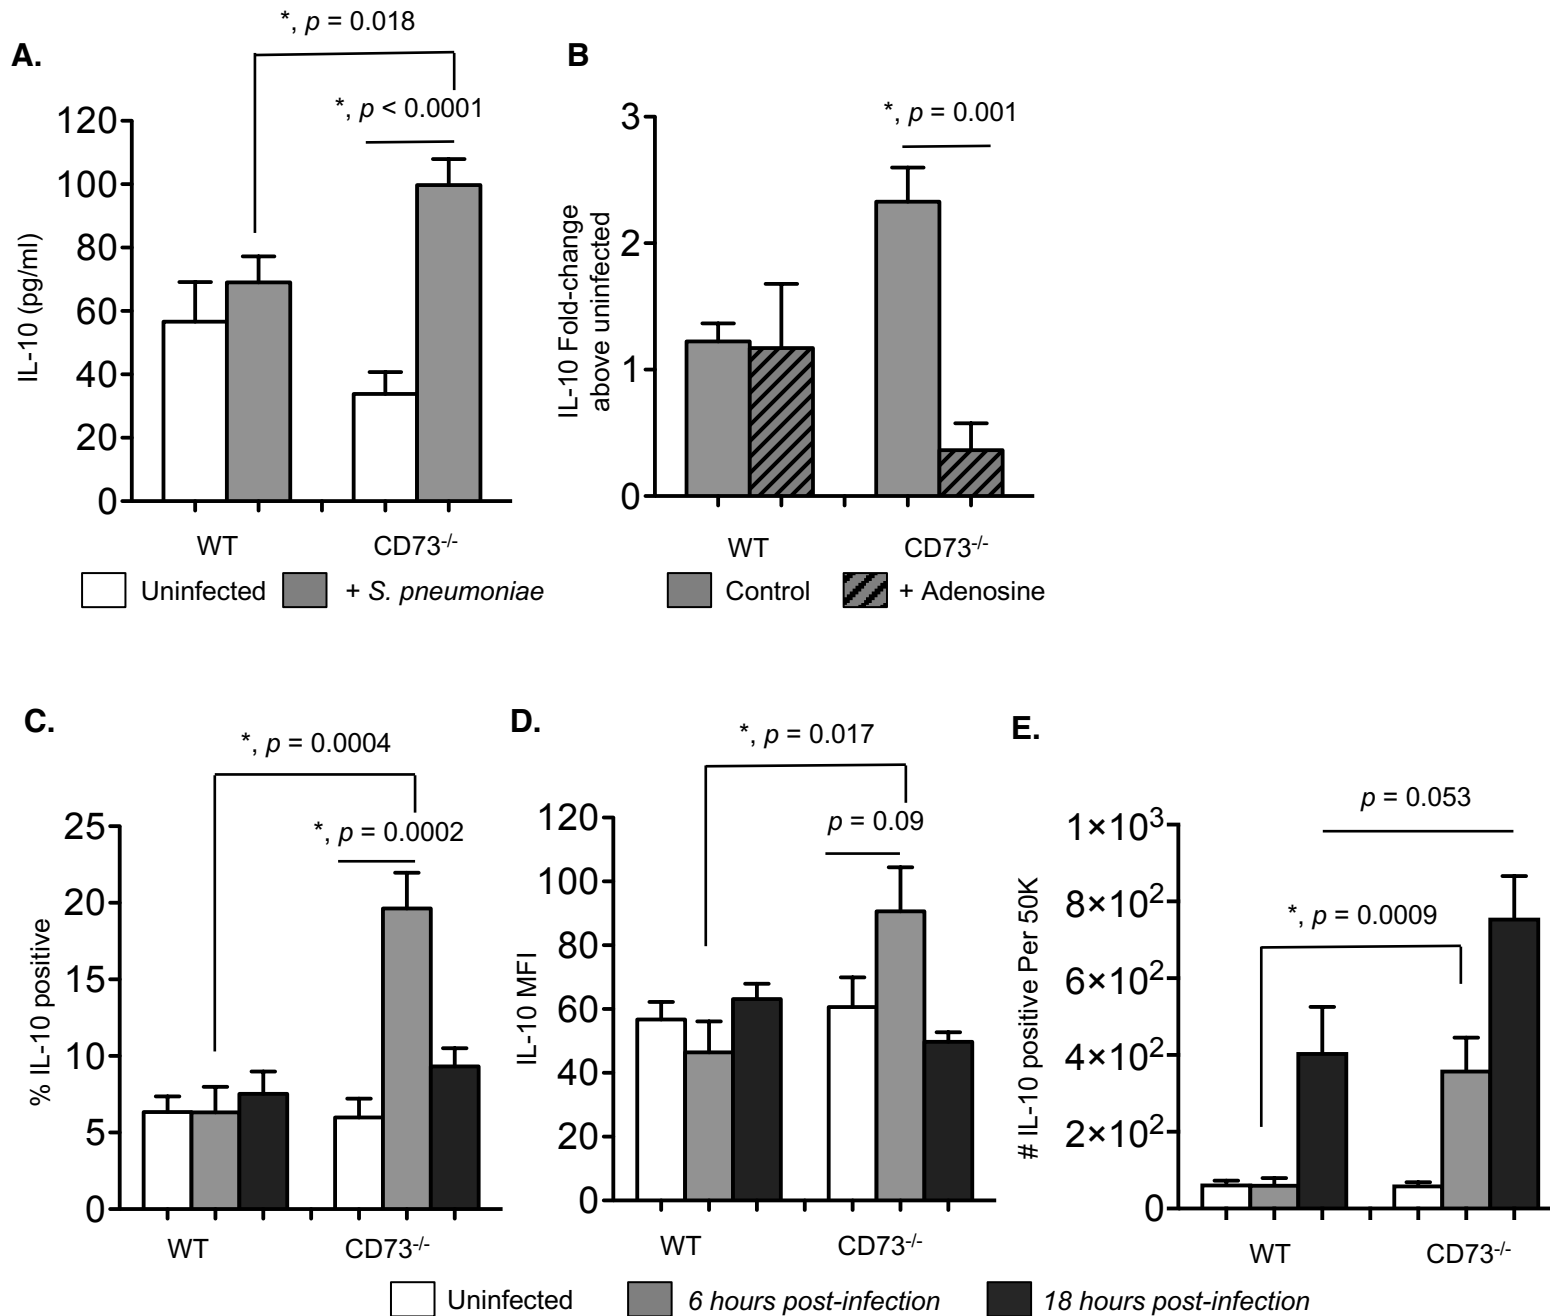

**Figure 5**

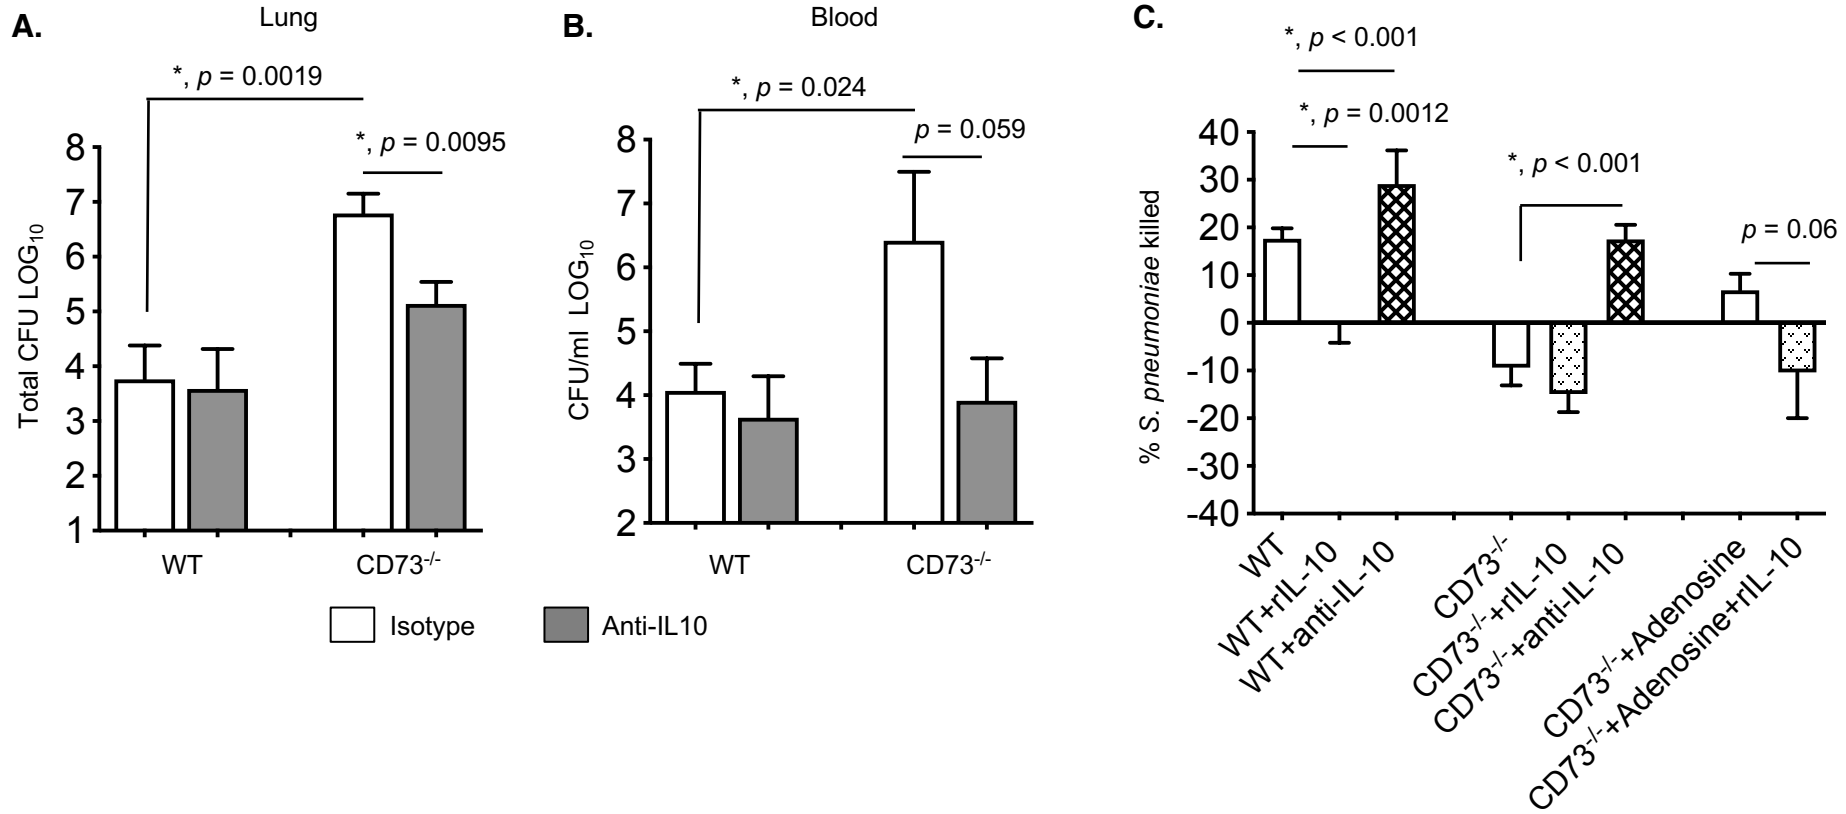

**Figure 6****A.**

ROS (Luminol)

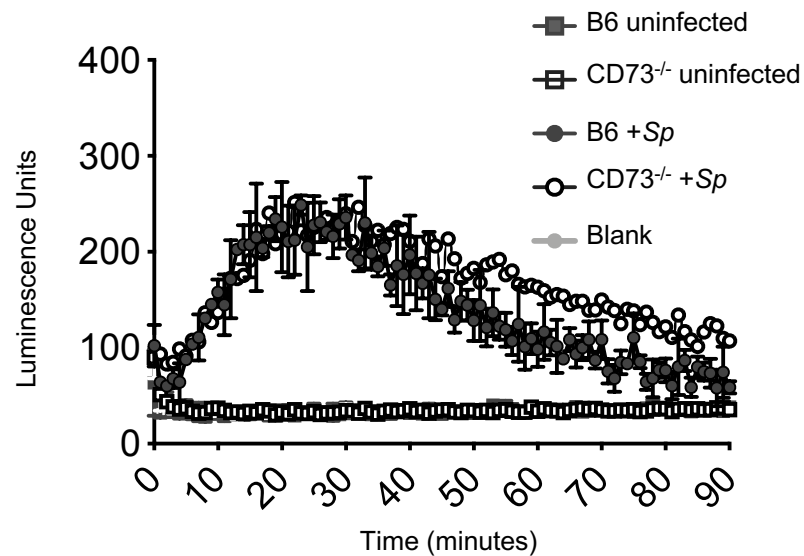**B.**

ROS (Isoluminol\_HRP)

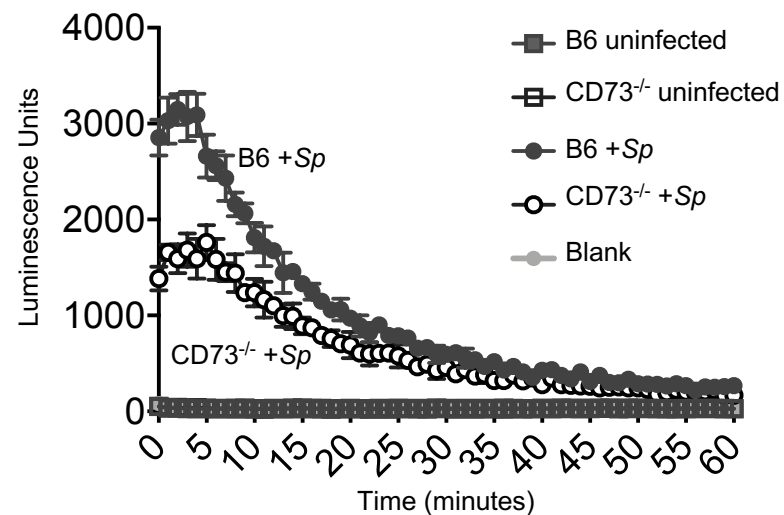**C.**

ROS (Isoluminol\_HRP)

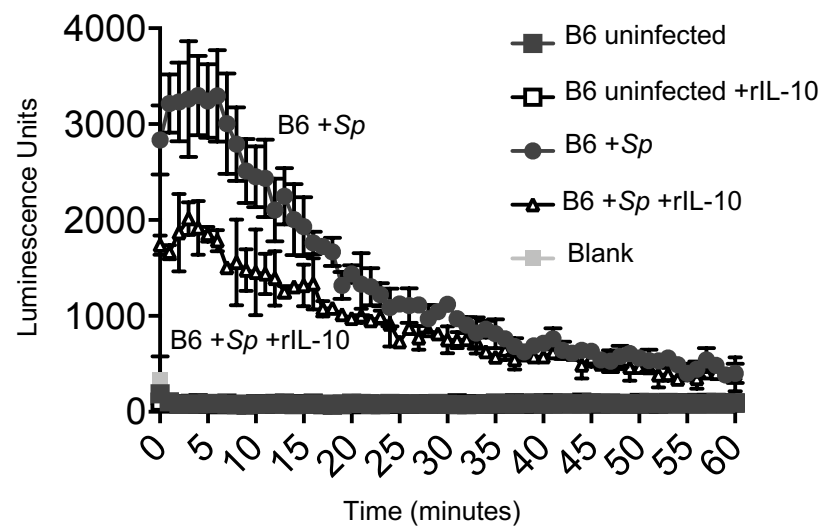**D.**

ROS (Isoluminol\_HRP)

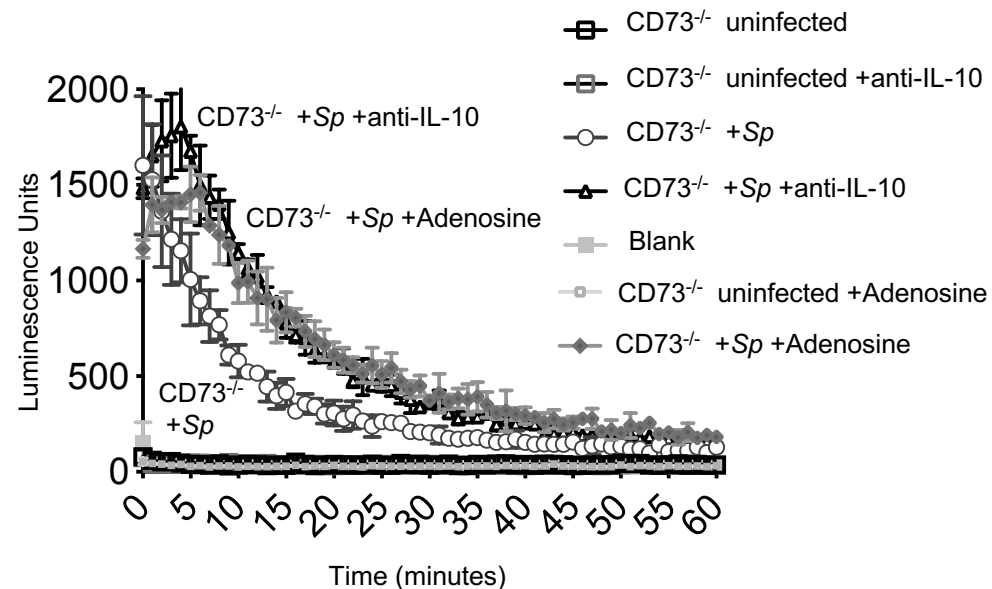

**Figure 7**

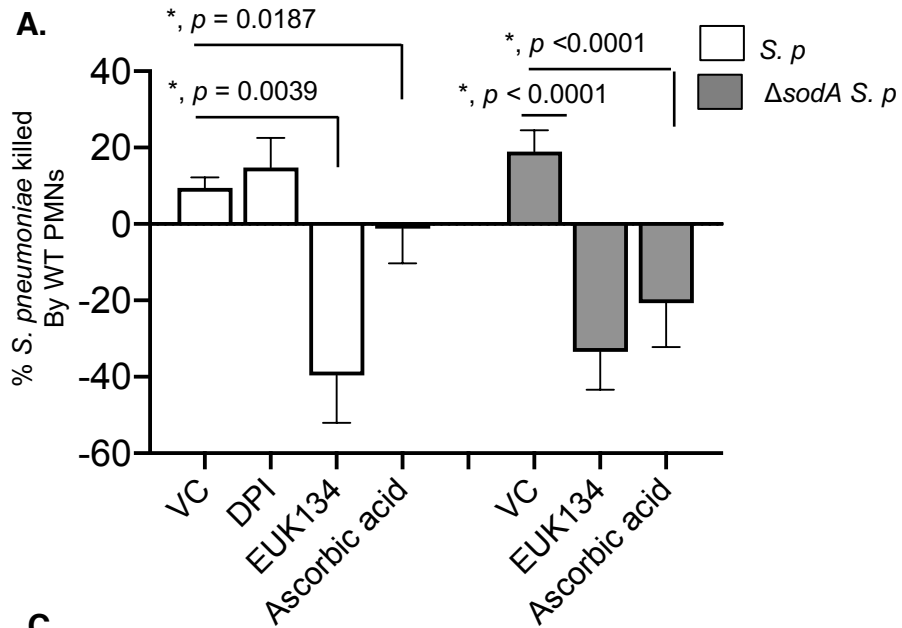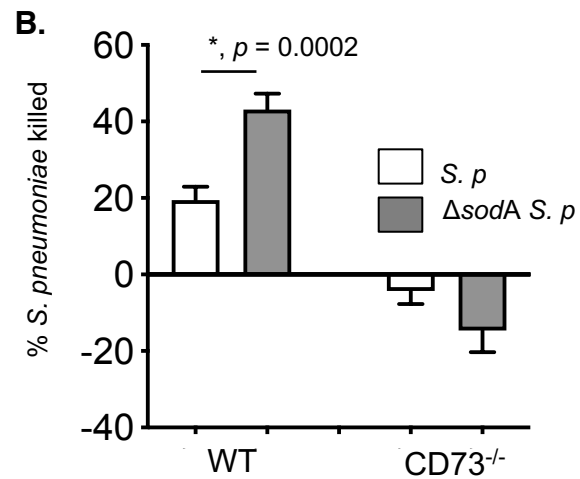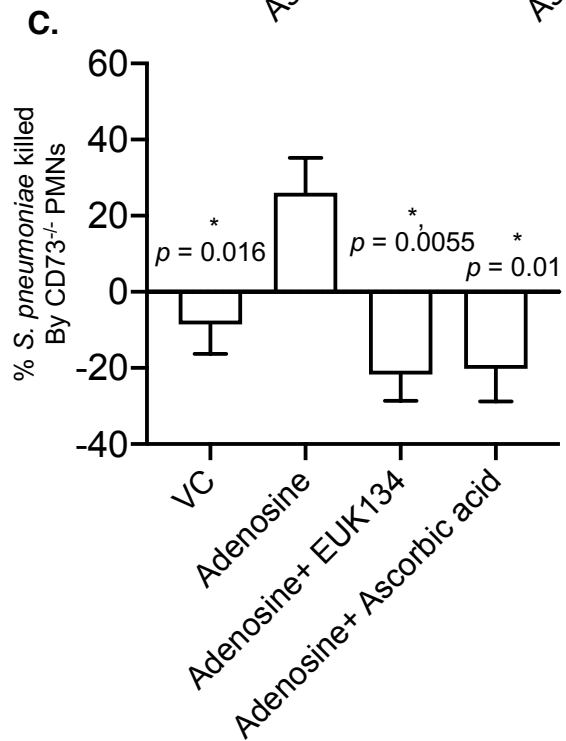



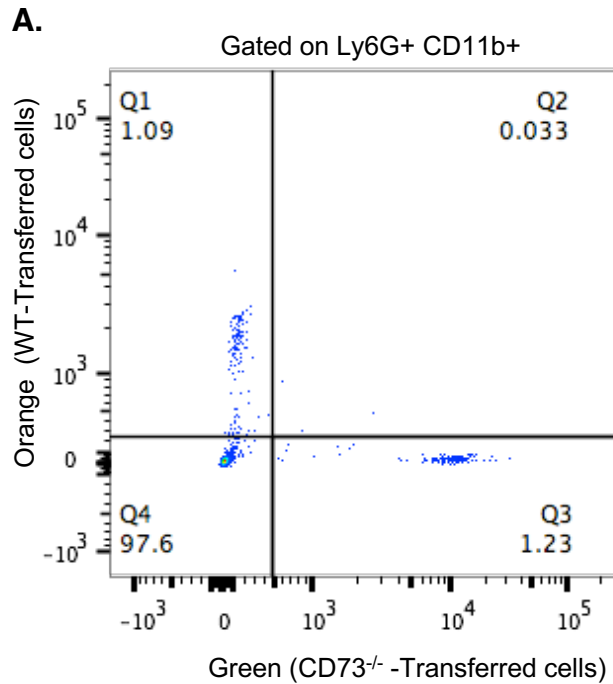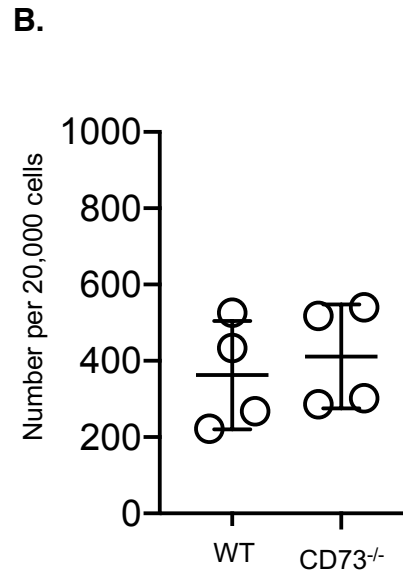

**Figure S1. Detection of transferred PMNs in the circulation.** CD73<sup>-/-</sup> mice were adoptively transferred  $1 \times 10^6$  PMNs isolated from bone marrows of wildtype (WT) mice and  $1 \times 10^6$  PMNs isolated from CD73<sup>-/-</sup> controls. The transferred PMNs were pre-labeled with CellTracker dyes Orange and Green for WT and CD73<sup>-/-</sup> respectively and their presence in blood confirmed by flow cytometry 3 hours post transfer. (A) A representative dot plot from one of four recipient mice and (B) the number of the transferred cells per recipient in the blood are shown.

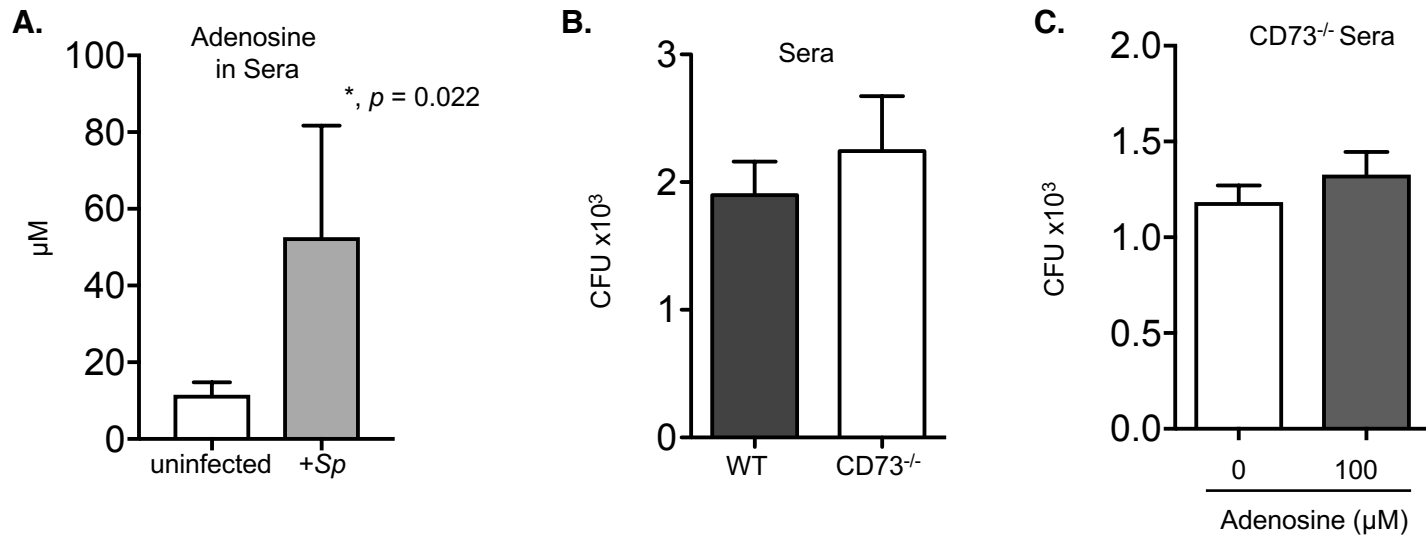

**Figure S2. Extracellular adenosine has no direct effect on bacterial survival.** (A) The adenosine levels in the sera of mice following pulmonary challenge with  $5 \times 10^5$  CFU of *S. pneumoniae* were measured using a fluorometric adenosine assay kit. Data shown are pooled from  $n=4$  uninfected mice and  $n=7$  infected mice. (B) *S. pneumoniae* were incubated with sera only from C57BL/6 (WT) or CD73<sup>-/-</sup> mice for 40 minutes at 37°C. (C) The indicated concentrations of adenosine or PBS (0) were added prior to the start of incubation. Viable bacteria were enumerated by plating on blood agar plates. (B-C) Data shown represent the means  $\pm$  SD and are pooled from two separate experiments with  $n=2$  mice and where each condition was tested in triplicates per experiment.

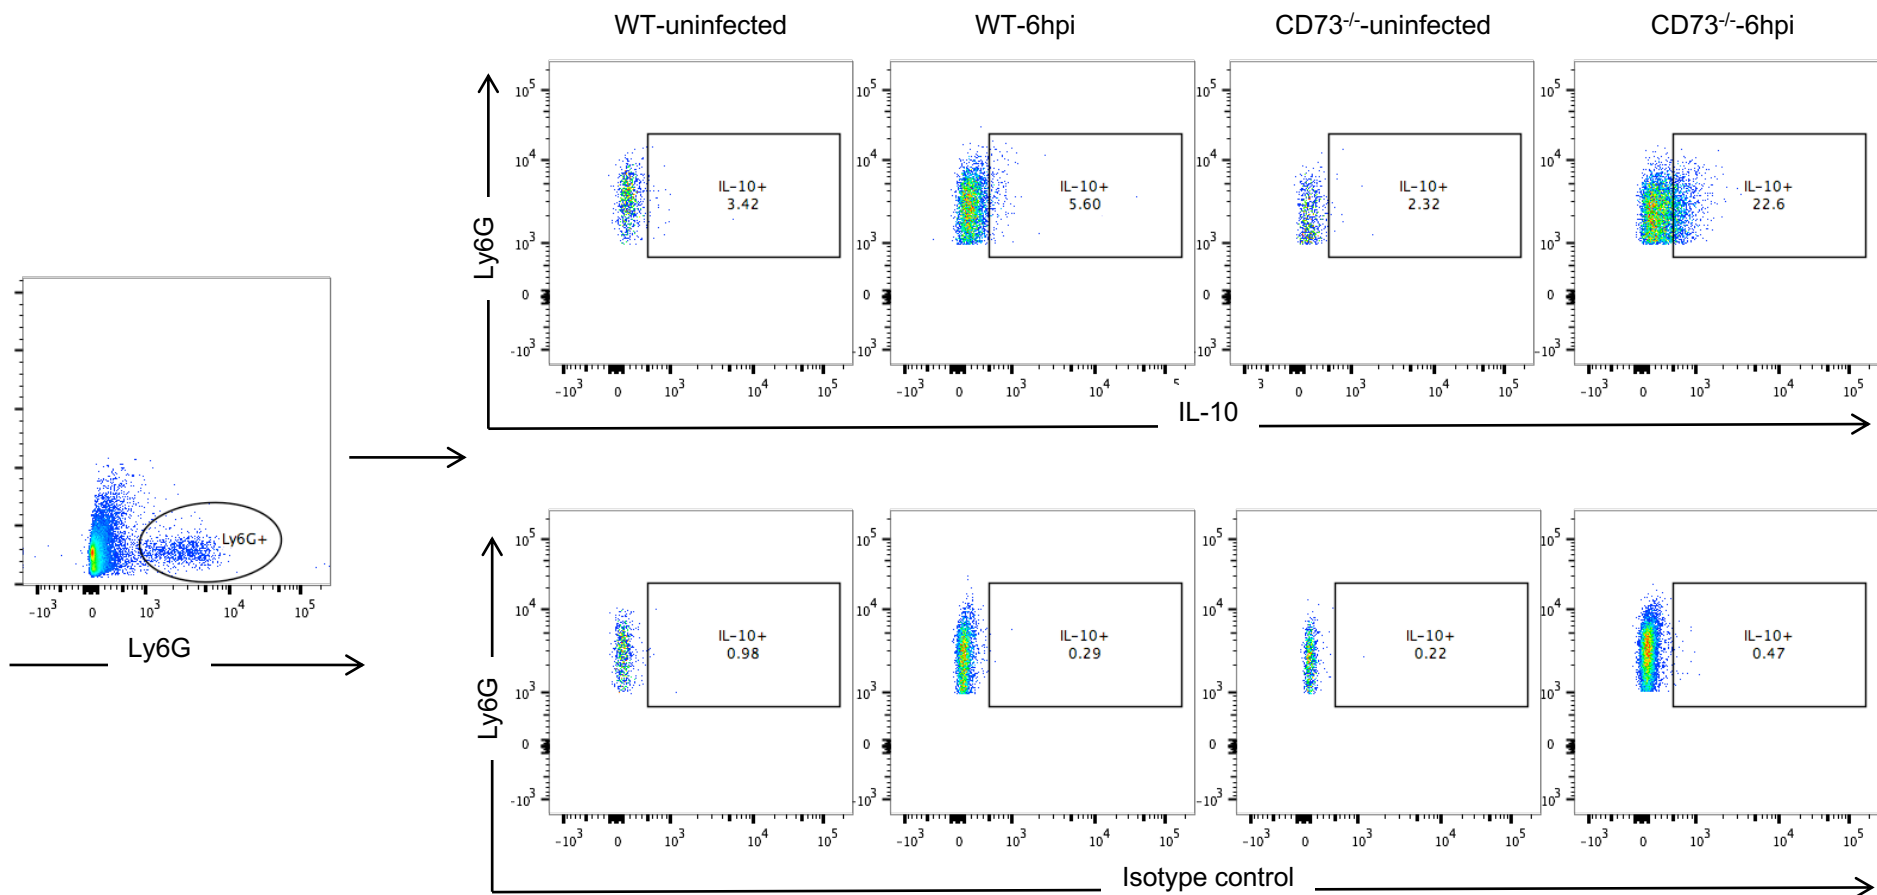

**Figure S3. Gating Strategy of IL-10 producing PMNs *in vivo*.** Wild-type C57BL/6 or CD73<sup>-/-</sup> mice were mock-infected or i.t challenged with  $5 \times 10^5$  CFU of *S. pneumoniae*. Six hours following challenge, the lungs were harvested, incubated with GolgiPlug and stained with Ly6G, IL-10 antibody or isotype control and IL-10 production by PMNs (Ly6G+) and analyzed by flow cytometry. Representative dot plots from one of three separate experiments are shown.

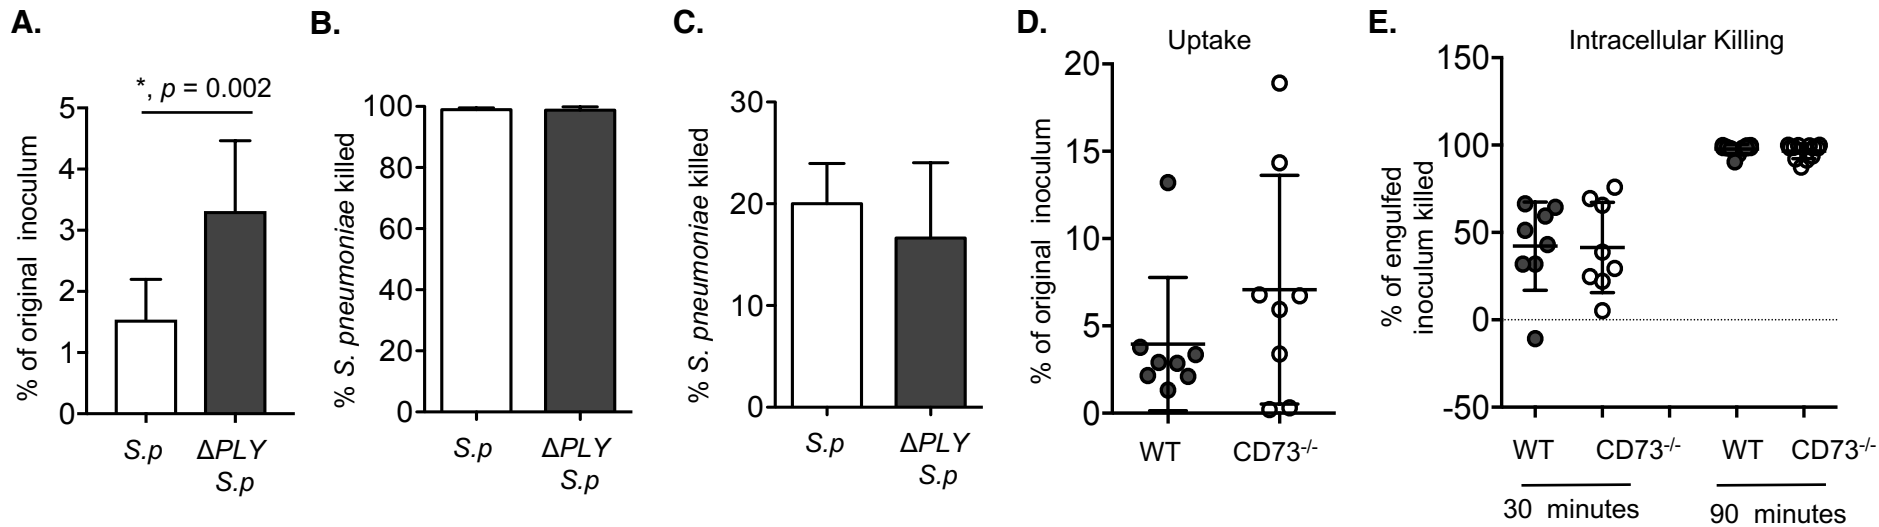

**Figure S4. CD73 does not affect bacterial uptake or intracellular killing by PMNs.** (A) Bone marrow PMNs from C57BL/6 mice were incubated for 40 minutes at 37°C with wild type or  $\Delta$ PLY *S. pneumoniae* that were pre-opsonized with homologous sera at an MOI of 2. Gentamicin (50 $\mu$ g/ml) was then added for 30 minutes to kill extracellular bacteria. PMNs were washed and plated on blood agar plates to determine the amount of bacteria engulfed and the % of bacteria taken up (uptake) of the original infecting inoculum was calculated. (B) Wild type (*S.p.*) or pneumolysin deficient ( $\Delta$ PLY *S.p.*) *S. pneumoniae* were incubated with 100  $\mu$ g/ml Gentamycin for 30 minutes and the percentage of bacteria killed compared to a mock treatment control was then calculated by plating on blood agar plates. (C) C57BL/6 PMNs were incubated for 45 minutes at 37°C with the indicated strains of wild type (*S.p.*) or pneumolysin deficient ( $\Delta$ PLY *S.p.*) *S. pneumoniae* pre-opsonized with sera. The percentage of bacteria killed compared to a no PMN control under the same conditions was then calculated by plating for viable bacteria on blood agar plates. (D-E) Bone marrow PMNs from the indicated strains of mice were incubated with *S. pneumoniae*  $\Delta$ PLY pre-opsonized with homologous sera at an MOI of 2 for 10 minutes at 37°C and gentamicin (50 $\mu$ g/ml) was then added for 30 minutes to kill extracellular bacteria. PMNs were then washed and one set (D) immediately plated on blood agar plates to determine the amount of bacteria engulfed and the % of bacteria taken up (uptake) of the original infecting inoculum was calculated. The other sets of PMNs (E) were incubated for 30 and 90 more minutes and then plated to enumerate viable bacteria. The % of bacteria of the engulfed inoculum that was killed was then calculated (Intracellular Killing). Data shown are pooled from (A) two separate experiments, (B) two separate experiments and (C) four separate experiments (n=4 mice) and (D-E) two separate experiments (n=2 mice per strain) where each condition was tested in quadruplicates per experiment. Values significantly different by Student's t-test are indicated by asterisk.

**A.**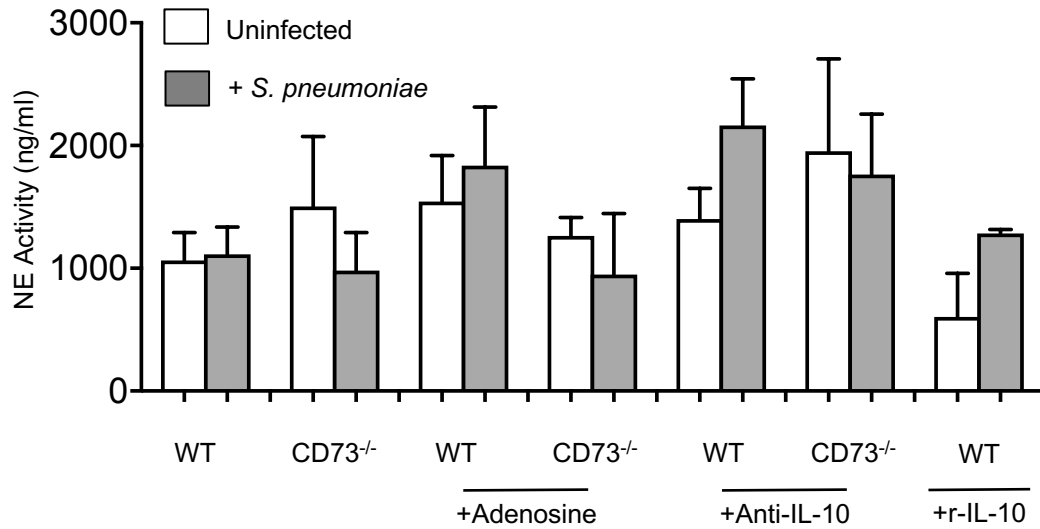**B.**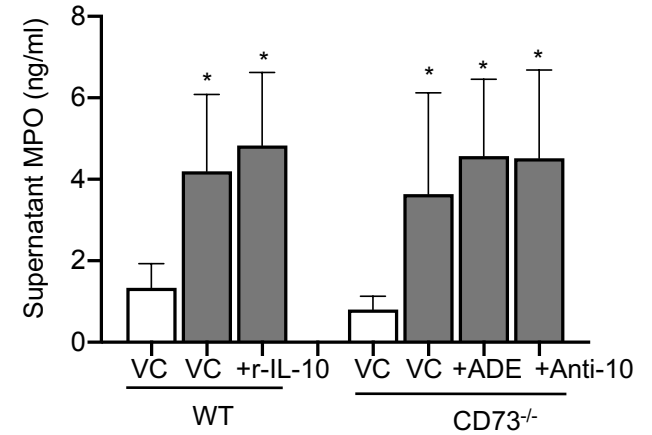**C.**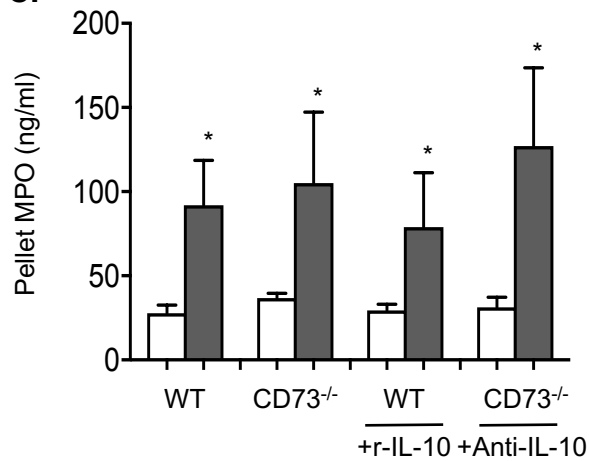

**Figure S5. CD73 does not affect production of Neutrophil Elastase or myeloperoxidase.** (A) PMNs were incubated for 45 minutes at 37°C with pre-opsonized *S. pneumoniae* or mock treated (uninfected) in the presence of control or adenosine (100μM), anti-IL-10 (1μg/ml JES5-2A5) or rIL-10 (50ng/mL). The supernatants were then collected and assayed for (A) Neutrophil Elastase activity (NE) and (B) myeloperoxidase (MPO) levels. (C) The cells were lysed and assayed for MPO levels. Data were pooled from four separate experiments with 4 mice per strain per condition. Asterisk indicated values significantly different from uninfected controls within the same condition by Student's t-test ( $p < 0.05$ ).

**A.**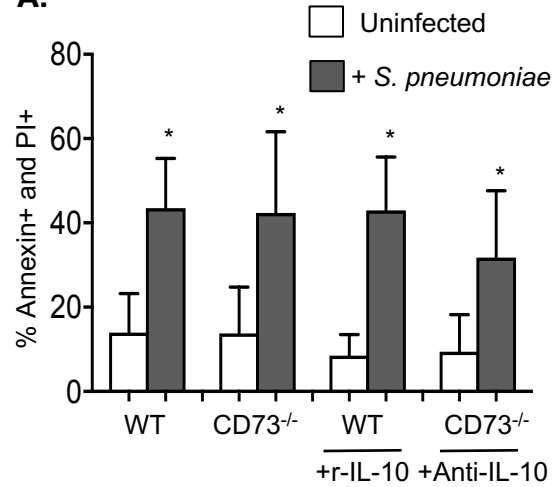

**Figure S6. CD73/IL-10 do not impact viability.** (A) PMNs were mock treated with PBS or treated for 20 minutes with the indicated anti-IL-10 (1  $\mu$ g/ml JES5-2A5) or rIL-10 (50ng/ml). PMNs were then incubated for 15 minutes at 37°C with *S. pneumoniae* pre-opsonized with matching sera at an MOI of 2 or mock treated (uninfected) with 3% matching mouse sera only. The percentage of apoptotic cells were then determined by flow cytometry. The percentage of PMNs (gated on Ly6G+ cells) that were double positive for PI and Annexin V are shown. Data were pooled from four separate experiments with 4 mice per strain per condition. Asterisk indicated values significantly different from uninfected controls within the same condition by Student's t-test ( $p < 0.05$ ).
